# Supplementary material for: Conjugated microporous polymer frameworks for sustainable energy materials – elucidating the influence of solvents on the porosity properties for future design principles
Source: Royal Society of Chemistry journal article supplement (doi:10.1039/d3ta04866g), 2024-01-01
Supplement: d3ta04866g1.pdf [file d3ta04866g1.pdf]

# **Conjugated Microporous Polymer Frameworks for Sustainable Energy Materials – elucidating the influence of solvents on the porosity properties for future design principles**

Catherine Mollart and Abbie Trewin\*

## **Supporting Information**

### **Contents**

|                                            |       |
|--------------------------------------------|-------|
| 1. CMP-1                                   | SI-2  |
| 2. Experimental                            | SI-4  |
| 3. Ambuild                                 | SI-8  |
| 4. Degree of Solvation Systems             | SI-9  |
| 5. Phase Separated Systems                 | SI-16 |
| 6. Solvent/Monomer Phase Interface Systems | SI-31 |
| 7. References                              | SI-46 |

## 1. CMP-1

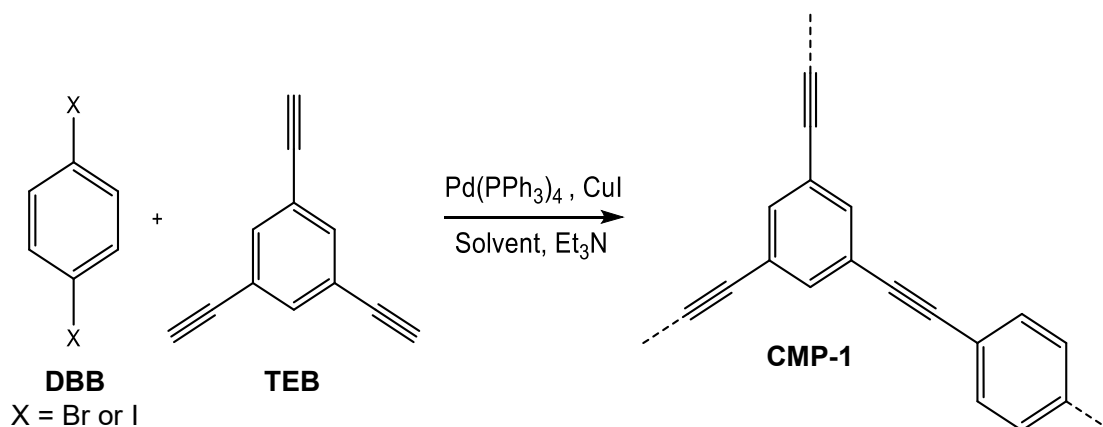

**Scheme SI.1.** Reaction scheme to synthesise CMP-1 from 1,4-dibromobenzene (DBB) and 1,3,5-triethynylbenzene (TEB) in the presence of a tetrakis(triphenylphosphine)palladium (0) catalyst, copper(I) iodide and solvent.

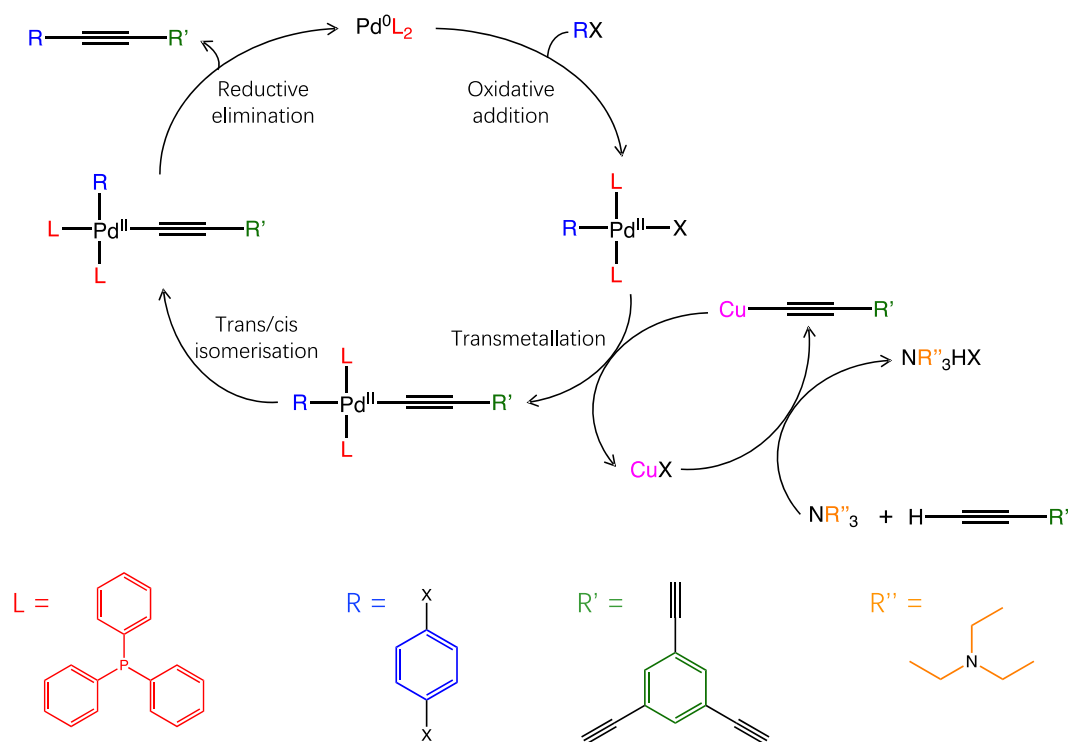

**Figure SI.1.** Sonogashira–Hagihara catalytic cycle to produce CMP-1. This consists of oxidative addition of DBB to the catalyst, transmetalation to substitute the bromine ligand with TEB, and reductive elimination of the cross-coupled product, regenerating the active catalyst. In the artificial synthesis, we take the approach described in reference 1 where we assume that the transmetalation side cycle has already occurred, and the TEB molecules are all terminated with copper atoms.<sup>1</sup>

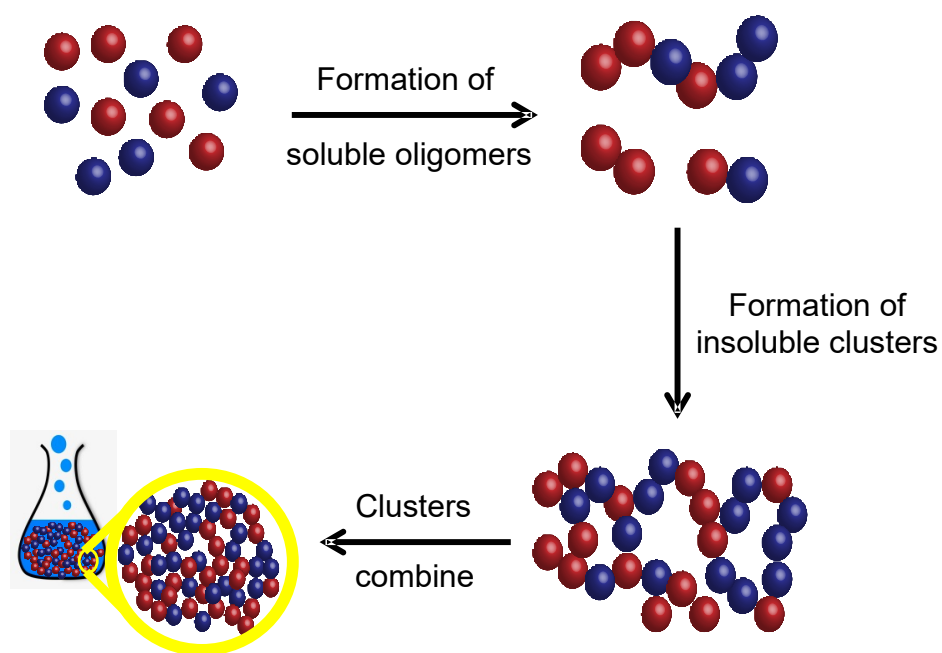

**Figure SI.2.** Cartoon representation of the polymer formation mechanism proposed for CMP-1 by Laybourn *et al.*<sup>2</sup>

## 2. Experimental

**Table SI.1.** Quantity of reagents used in the experimental synthesis of CMP-1 reported by Dawson *et al.*<sup>3</sup>

| Reagent                            | Quantity | Millimoles |
|------------------------------------|----------|------------|
| Pd(PPh <sub>3</sub> ) <sub>4</sub> | 50 mg    | 0.04       |
| 1,4-Dibromobenzene                 | 236 mg   | 1          |
| 1,3,5-Triethynylbenzene            | 150 mg   | 1          |
| Copper(I) iodide                   | 15 mg    | 0.08       |
| Triethylamine                      | 1.5 mL   | 10.76      |
| N,N-dimethylformamide              | 2.5 mL   | 32.29      |
| Toluene                            | 2.5 mL   | 23.47      |
| Tetrahydrofuran                    | 2.5 mL   | 30.82      |
| 1,4-Dioxane                        | 2.5 mL   | 29.34      |

### Real world synthesis

TEB and DBB dissolved in solvent and TEA. Reaction mixture heated, then the catalyst and CuI were added.

The reaction mixture was left to stir for 3 days.

Product collection, reaction quenching with methanol. Extraction with methanol (16 h). Product dried under vacuum (60 °C, 16 h).

### Artificial synthesis

Seeding of the Ambuild simulation cell.

Network generation process incorporating the *zipBlocks* tests, geometry optimisation and MD.

Desolvation, homocoupling, workup and cell equilibration.

CMP-1

**Figure SI.3.** Comparison of how each step of the experimental synthesis procedure<sup>13</sup> is mimicked computationally.<sup>3</sup>

**Table SI.2.** Experimental porosity data for CMP-1 generated in DMF, toluene, THF and 1,4-dioxane by Dawson *et al.*,<sup>3</sup> solvent polarity indices,<sup>4</sup> Hildebrand solubility parameters and their contributing Hansen components.<sup>5</sup> SA – surface area.

| Solvent                                               | Toluene                                                                           | THF                                                                               | 1,4-Dioxane                                                                         | DMF                                                                                 |
|-------------------------------------------------------|-----------------------------------------------------------------------------------|-----------------------------------------------------------------------------------|-------------------------------------------------------------------------------------|-------------------------------------------------------------------------------------|
| Structure                                             | 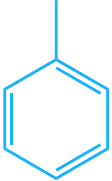 | 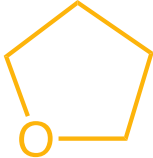 | 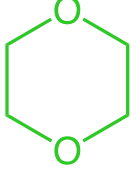 | 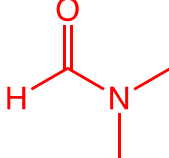 |
| Polarity index                                        | 2.4                                                                               | 4.0                                                                               | 4.8                                                                                 | 6.4                                                                                 |
| Hildebrand solubility parameter / MPa <sup>0.5</sup>  | 18.2                                                                              | 19.4                                                                              | 20.5                                                                                | 24.8                                                                                |
| Dispersion component / MPa <sup>0.5</sup>             | 18.0                                                                              | 16.8                                                                              | 19.0                                                                                | 17.4                                                                                |
| Polar component / MPa <sup>0.5</sup>                  | 1.4                                                                               | 5.7                                                                               | 1.8                                                                                 | 13.7                                                                                |
| Hydrogen bonding component / MPa <sup>0.5</sup>       | 2.0                                                                               | 8.0                                                                               | 7.4                                                                                 | 11.3                                                                                |
| Total CMP-1 SA / m <sup>2</sup> g <sup>-1</sup>       | 867                                                                               | 941                                                                               | 609                                                                                 | 837                                                                                 |
| Microporous CMP-1 SA / m <sup>2</sup> g <sup>-1</sup> | 286                                                                               | 273                                                                               | 390                                                                                 | 594                                                                                 |
| Micropore volume / cm <sup>3</sup> g <sup>-1</sup>    | 0.33                                                                              | 0.36                                                                              | 0.23                                                                                | 0.32                                                                                |
| Mesoporous CMP-1 SA / m <sup>2</sup> g <sup>-1</sup>  | 581                                                                               | 668                                                                               | 219                                                                                 | 243                                                                                 |

### Hansen solubility parameters

The Hansen solubility parameters, first designed by Charles Hansen in 1966, are designed to split the total Hildebrand solubility parameter into three components to better understand why two solvents with very similar Hildebrand solubility parameters exhibit different solubility behaviours.<sup>5</sup> The Hansen parameters separate the total Hildebrand solubility parameter as follows (Equation 1):

$$\delta_t^2 = \delta_d^2 + \delta_p^2 + \delta_h^2$$

**Equation 1**

Where  $\delta_t^2$  is the total Hildebrand solubility parameter,  $\delta_d^2$  is the dispersion component arising from induced attractions between molecules,  $\delta_p^2$  is the polar component arising from permanent dipole – permanent dipole interactions between polar molecules, or from permanent dipole – induced dipole interactions between a polar and non-polar molecule, respectively, and  $\delta_h^2$  is the hydrogen bonding component.<sup>5</sup>

The three HSP values for a particular molecule can be used to define a three-dimensional point at the centre of the solubility sphere for that molecule. The radius of the sphere is referred to as the interaction radius for that molecule. If the HSP values of the solvent correspond to a coordinate that is within the solubility sphere of the polymer, the polymer should be soluble in that solvent.<sup>5</sup> The distance between the HSP coordinates of the solvent and polymer can be calculated as in Equation 2:

$$D_{S-P} = 4(\delta_{d(s)} - \delta_{d(p)})^2 + (\delta_{p(s)} - \delta_{p(p)})^2 + (\delta_{h(s)} - \delta_{h(p)})^2 \quad \text{Equation 2}^5$$

Where  $D_{S-P}$  is the distance between the HSP coordinates of the solvent and the polymer,  $\delta_{x(s)}$  is the Hansen solubility component of the solvent (x referring to the dispersion, polar, or hydrogen bonding components depending on the location within the equation), and  $\delta_{x(p)}$  is the Hansen solubility component of the polymer. If the  $D_{S-P}$  value is smaller than the interaction radius of the polymer, the polymer should be soluble in that solvent.<sup>5</sup>

**Table SI.3.** Experimental elemental analysis data for CMP-1.<sup>3</sup>

| Solvent     | Elemental Analysis / % |      |           |
|-------------|------------------------|------|-----------|
|             | C                      | H    | Remaining |
| Toluene     | 78.72                  | 3.45 | 17.83     |
| THF         | 78.81                  | 3.35 | 17.84     |
| 1,4-Dioxane | 75.77                  | 3.42 | 20.81     |
| DMF         | 80.10                  | 3.55 | 16.35     |

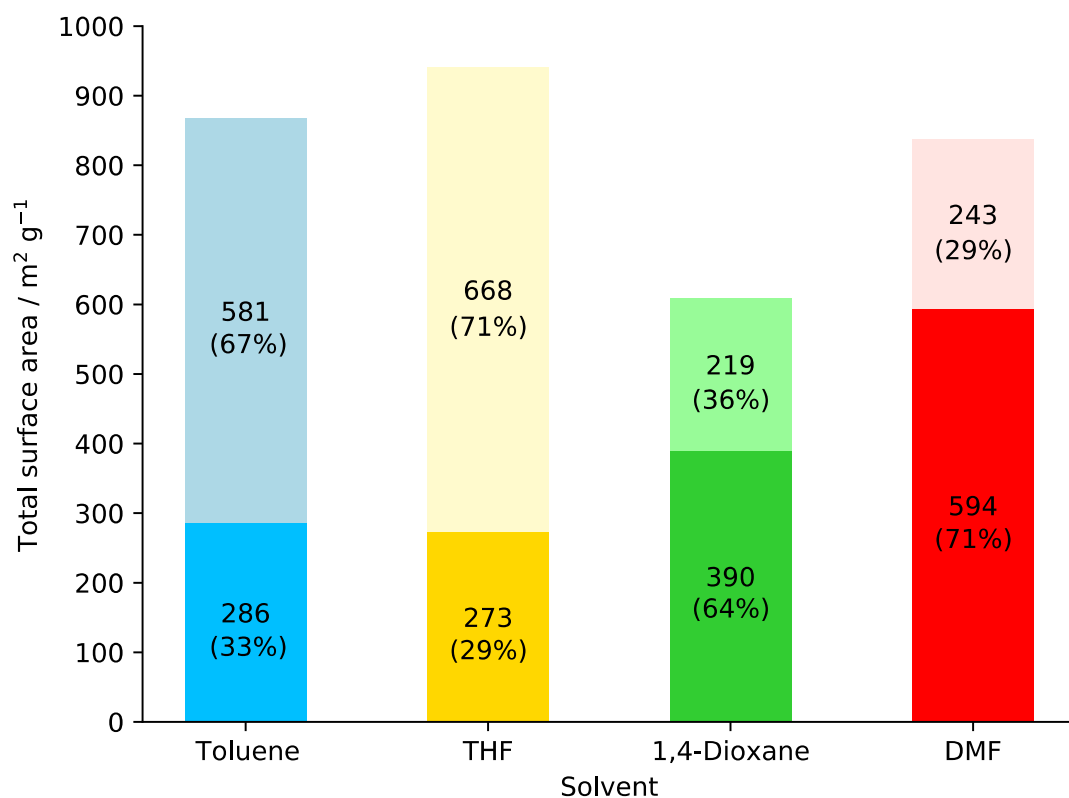

**Figure SI.4.** Plot of the micro- (bottom) and mesoporous (top) contributions to the total surface area of the experimental CMP-1 systems reported by Dawson *et al.*<sup>3</sup> Key: Microporosity – dark shades, Mesoporosity – pale shades. The respective percentages of micro- and mesoporosity in each system are given in brackets below the actual surface area values.

### 3. Ambuild

The structural models discussed in this work were generated using the Ambuild code, which has been discussed previously.<sup>1, 6-10</sup> Ambuild, a python-based code, is specifically designed to model amorphous hyper-crosslinked polymers (HCPs) such as covalent triazine frameworks (CTFs) and conjugated microporous polymers (CMPs), and due to the nature of the code, the full synthetic conditions and catalytic cycle are modelled, allowing the generation of structural models that can be compared to experiment. Ambuild is able to take advantage of GPU acceleration, meaning larger simulation cell sizes can be modelled within a reasonable timescale, a factor that is especially important when modelling amorphous materials in order to sample multiple regions of the experimental material. HOOMD-blue<sup>11, 12</sup> was utilised as the geometry optimisation and molecular dynamics (MD) engine throughout, and porosity analysis was conducted using Poreblazer.<sup>13, 14</sup> The Polymer Consistent Forcefield (PCFF)<sup>15</sup> was used throughout our modelling approach, as it is an appropriate forcefield to model microporous polymers such as CMP-1.

In the case of CMP-1, the building blocks were set up as in reference 1, where the end group and cap atoms of the DBB, TEB and catalyst molecules are set to be: DBB – C, Br; TEB – C, Cu and catalyst – Pd, H ‘placeholder’ atom, respectively. New bonds may form between the end group atoms if they meet the required bond and angle criteria, with the cap atoms, which create a vector for the new bond to lie along, being lost on forming the bond. To mimic the Sonogashira–Hagihara catalytic cycle, monomer end groups must first bond to a catalyst molecule before being able to form a bond to another monomer bound to a catalyst molecule, breaking the respective bonds to the catalyst on forming the new bond.

## 4. Degree of Solvation Systems

The initial models generated in the presence of various quantities of solvent (1%, 33%, 67%, 100% of the experimental quantity) were generated by firstly seeding the smallest possible simulation cell size (Table SI.4) with the quantities of building blocks given in Table SI.5, with four repeat models generated per system.

**Table SI.4.** Minimum cell lengths used for each of the fully mixed systems generated with varying quantities of solvent.

| Solvent | Quantity of solvent with respect to experimental stoichiometry |      |      |      |
|---------|----------------------------------------------------------------|------|------|------|
|         | 1%                                                             | 33%  | 67%  | 100% |
| Toluene | 47 Å                                                           | 64 Å | 77 Å | 87 Å |
| THF     | 48 Å                                                           | 56 Å | 68 Å | 76 Å |
| Dioxane | 48 Å                                                           | 61 Å | 75 Å | 84 Å |
| DMF     | 47 Å                                                           | 58 Å | 70 Å | 80 Å |

**Table SI.5.** Number of building blocks seeded to the simulation cell for each of the fully mixed systems generated with varying quantities of solvent.

| Building block | Quantity of solvent with respect to experimental stoichiometry |      |      |      |
|----------------|----------------------------------------------------------------|------|------|------|
|                | 1%                                                             | 33%  | 67%  | 100% |
| Catalyst       | 4                                                              | 4    | 4    | 4    |
| DBB            | 100                                                            | 100  | 100  | 100  |
| TEB            | 100                                                            | 100  | 100  | 100  |
| TEA            | 11                                                             | 359  | 717  | 1076 |
| Toluene        | 23                                                             | 782  | 1565 | 2347 |
| THF            | 31                                                             | 1027 | 2055 | 3082 |
| Dioxane        | 29                                                             | 978  | 1956 | 2934 |
| DMF            | 32                                                             | 1076 | 2153 | 3229 |

Once seeded, a loop was undertaken comprising of zipBlocks tests, geometry optimisation, and NVT (constant number of molecules, cell volume and temperature) MD. The zipBlocks test is designed to increase the bond length and angle margins from those initially determined, before looping over all of the free end groups within the cell and allowing any that meet the relaxed criteria to form bonds, followed by a further geometry optimisation. This loop continued until no new bonds had formed during the final twenty zipBlocks tests, at which point the network generation was deemed complete. Following this, the cell was desolvated using schemes 1-6, described in detail in reference 1 and summarised below:

Scheme 1 – Remove solvent, monomers, and catalyst (quickly) with NVT MD throughout, followed by cell workup and NPT (constant number of molecules, cell pressure and temperature) MD.

Scheme 2 – Remove solvent, monomers, oligomers up to three building blocks, and catalyst with NVT MD throughout, followed by cell workup and NPT MD.

Scheme 3 – Remove solvent, monomers, oligomers up to two building blocks, and catalyst with NVT MD throughout, followed by cell workup and NPT MD.

Scheme 4 – Remove solvent, monomers, and catalyst (slowly) with NVT MD throughout, followed by cell workup and NPT MD.

Scheme 5 – Remove solvent with NVT MD throughout, followed by cell workup and NPT MD.

Scheme 6 – Remove solvent, monomers, and catalyst with NVT MD throughout, followed by alkyne-alkyne homocoupling, cell workup and NPT MD.

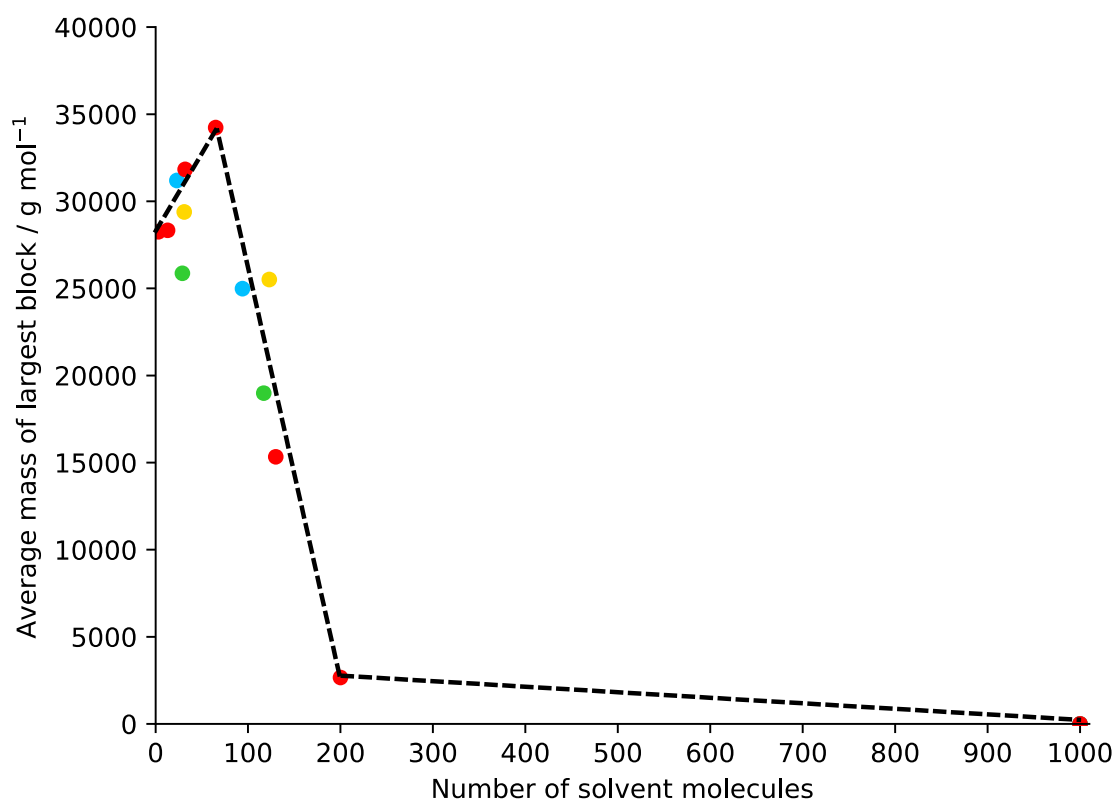

**Figure SI.5.** Plot of the average mass of the largest block in the cell for each model set against the number of solvent molecules. Key: toluene – blue, THF – yellow, 1,4-dioxane – green, DMF – red, overall trendline based on DMF data – black dashed.

The porosity analysis for the fully mixed systems calculated using various quantities of solvent, calculated using Poreblazer, is given in Tables SI.6–SI.9.

**Table SI.6.** Porosity data for the fully mixed CMP-1 models generated using various quantities of toluene, averaged across repeat models 1–4. PLD – pore limiting diameter, MPD – maximum pore diameter, He volume – pore volume based on a helium probe, accessible SA – network accessible surface area.

| % Solvent | Desolvation scheme | PLD / Å                       | MPD / Å | He Volume / cm <sup>3</sup> g <sup>-1</sup> | Accessible SA / m <sup>2</sup> g <sup>-1</sup> | Density / g cm <sup>-3</sup> | % Size of Initial Cell |
|-----------|--------------------|-------------------------------|---------|---------------------------------------------|------------------------------------------------|------------------------------|------------------------|
| 100       | 1                  | 3.50                          | 6.65    | 0.368                                       | 724                                            | 1.079                        | 20.75                  |
|           | 2                  | 2.74                          | 4.90    | 0.196                                       | 0                                              | 1.177                        | 15.23                  |
|           | 3                  | 2.45                          | 4.47    | 0.146                                       | 0                                              | 1.242                        | 18.93                  |
|           | 4                  | 3.48                          | 6.80    | 0.429                                       | 886                                            | 1.091                        | 20.95                  |
|           | 5                  | 4.16                          | 7.64    | 0.324                                       | 517                                            | 1.139                        | 24.82                  |
|           | 6                  | 2.94                          | 6.08    | 0.194                                       | 227                                            | 1.203                        | 21.41                  |
| 67        | 1                  | 6.17                          | 10.21   | 0.920                                       | 2365                                           | 0.640                        | 27.05                  |
|           | 2                  | Empty cell after desolvation. |         |                                             |                                                |                              |                        |
|           | 3                  | 15.06                         | 18.29   | 5.708                                       | 2216                                           | 0.159                        | 27.03                  |
|           | 4                  | 7.23                          | 10.86   | 0.920                                       | 2406                                           | 0.640                        | 27.04                  |
|           | 5                  | 5.38                          | 9.82    | 0.584                                       | 1318                                           | 0.845                        | 27.06                  |
|           | 6                  | 2.75                          | 6.07    | 0.213                                       | 184                                            | 1.123                        | 22.47                  |
| 33        | 1                  | 7.13                          | 10.57   | 0.918                                       | 2224                                           | 0.638                        | 32.52                  |
|           | 2                  | 10.01                         | 13.57   | 2.351                                       | 5562                                           | 0.344                        | 32.54                  |
|           | 3                  | 9.28                          | 12.86   | 2.040                                       | 4818                                           | 0.383                        | 32.55                  |
|           | 4                  | 6.31                          | 9.98    | 0.925                                       | 2385                                           | 0.638                        | 32.52                  |
|           | 5                  | 6.36                          | 11.22   | 0.334                                       | 761                                            | 1.143                        | 45.05                  |
|           | 6                  | 3.89                          | 8.14    | 0.256                                       | 429                                            | 1.184                        | 36.82                  |
| 1         | 1                  | 6.11                          | 11.89   | 0.874                                       | 2030                                           | 0.640                        | 100.00                 |
|           | 2                  | 6.10                          | 12.47   | 1.068                                       | 2562                                           | 0.562                        | 99.60                  |
|           | 3                  | 6.43                          | 12.67   | 1.044                                       | 2477                                           | 0.566                        | 99.80                  |
|           | 4                  | 5.34                          | 11.91   | 0.889                                       | 2011                                           | 0.631                        | 100.00                 |
|           | 5                  | 2.64                          | 7.24    | 0.227                                       | 48                                             | 1.049                        | 100.00                 |
|           | 6                  | 4.07                          | 9.51    | 0.433                                       | 612                                            | 0.896                        | 100.00                 |

**Table SI.7.** Porosity data for the fully mixed CMP-1 models generated using various quantities of THF, averaged across repeat models 1–4. PLD – pore limiting diameter, MPD – maximum pore diameter, He volume – pore volume based on a helium probe, accessible SA – network accessible surface area.

| % Solvent | Desolvation scheme | PLD / Å | MPD / Å | He Volume / cm <sup>3</sup> g <sup>-1</sup> | Accessible SA / m <sup>2</sup> g <sup>-1</sup> | Density / g cm <sup>-3</sup> | % Size of Initial Cell |
|-----------|--------------------|---------|---------|---------------------------------------------|------------------------------------------------|------------------------------|------------------------|
| 100       | 1                  | 2.18    | 4.65    | 0.236                                       | 0                                              | 1.038                        | 14.21                  |
|           | 2                  |         |         | Empty cell after desolvation.               |                                                |                              |                        |
|           | 3                  |         |         | Empty cell after desolvation.               |                                                |                              |                        |
|           | 4                  | 2.40    | 4.30    | 0.233                                       | 0                                              | 1.038                        | 14.21                  |
|           | 5                  | 7.30    | 11.39   | 1.169                                       | 2716                                           | 0.640                        | 25.68                  |
|           | 6                  | 2.60    | 4.25    | 0.273                                       | 0                                              | 1.035                        | 14.22                  |
| 67        | 1                  | 15.71   | 21.19   | 6.452                                       | 4398                                           | 0.142                        | 30.82                  |
|           | 2                  |         |         | Empty cell after desolvation.               |                                                |                              |                        |
|           | 3                  |         |         | Empty cell after desolvation.               |                                                |                              |                        |
|           | 4                  | 16.02   | 20.41   | 6.452                                       | 4331                                           | 0.142                        | 30.82                  |
|           | 5                  | 8.40    | 12.81   | 1.413                                       | 3552                                           | 0.487                        | 30.69                  |
|           | 6                  | 2.55    | 5.34    | 0.320                                       | 0                                              | 0.953                        | 16.34                  |
| 33        | 1                  | 6.92    | 11.60   | 1.078                                       | 2878                                           | 0.580                        | 37.24                  |
|           | 2                  |         |         | Empty cell after desolvation.               |                                                |                              |                        |
|           | 3                  | 14.33   | 18.42   | 5.715                                       | 2093                                           | 0.158                        | 37.21                  |
|           | 4                  | 7.54    | 10.95   | 1.069                                       | 2721                                           | 0.580                        | 37.24                  |
|           | 5                  | 7.43    | 11.16   | 1.050                                       | 2709                                           | 0.591                        | 37.23                  |
|           | 6                  | 2.57    | 5.16    | 0.155                                       | 27                                             | 1.213                        | 29.13                  |
| 1         | 1                  | 6.05    | 12.41   | 0.999                                       | 2286                                           | 0.570                        | 93.27                  |
|           | 2                  | 6.12    | 12.37   | 1.082                                       | 2540                                           | 0.539                        | 91.33                  |
|           | 3                  | 6.20    | 12.90   | 1.085                                       | 2542                                           | 0.538                        | 92.09                  |
|           | 4                  | 6.64    | 12.72   | 1.000                                       | 2308                                           | 0.570                        | 93.28                  |
|           | 5                  | 3.33    | 8.90    | 0.337                                       | 296                                            | 0.920                        | 100.00                 |
|           | 6                  | 5.65    | 12.54   | 0.600                                       | 1218                                           | 0.778                        | 98.89                  |

**Table SI.8.** Porosity data for the fully mixed CMP-1 models generated using various quantities of 1,4-dioxane, averaged across repeat models 1–4. PLD – pore limiting diameter, MPD – maximum pore diameter, He volume – pore volume based on a helium probe, accessible SA – network accessible surface area.

| % Solvent | Desolvation scheme | PLD / Å | MPD / Å | He Volume / cm <sup>3</sup> g <sup>-1</sup> | Accessible SA / m <sup>2</sup> g <sup>-1</sup> | Density / g cm <sup>-3</sup> | % Size of Initial Cell |
|-----------|--------------------|---------|---------|---------------------------------------------|------------------------------------------------|------------------------------|------------------------|
| 100       | 1                  | 1.93    | 4.27    | 0.109                                       | 0                                              | 1.287                        | 17.15                  |
|           | 2                  |         |         | Empty cell after desolvation.               |                                                |                              |                        |
|           | 3                  |         |         | Empty cell after desolvation.               |                                                |                              |                        |
|           | 4                  | 2.42    | 4.72    | 0.137                                       | 74                                             | 1.267                        | 17.28                  |
|           | 5                  | 1.97    | 4.63    | 0.121                                       | 0                                              | 1.270                        | 19.01                  |
|           | 6                  | 2.63    | 4.79    | 0.174                                       | 82                                             | 1.199                        | 17.56                  |
| 67        | 1                  | 7.40    | 11.15   | 1.026                                       | 2678                                           | 0.594                        | 27.75                  |
|           | 2                  |         |         | Empty cell after desolvation.               |                                                |                              |                        |
|           | 3                  |         |         | Empty cell after desolvation.               |                                                |                              |                        |
|           | 4                  | 7.38    | 10.77   | 1.026                                       | 2630                                           | 0.595                        | 27.74                  |
|           | 5                  | 7.34    | 11.46   | 0.977                                       | 2489                                           | 0.616                        | 27.75                  |
|           | 6                  | 2.47    | 4.76    | 0.152                                       | 0                                              | 1.218                        | 21.86                  |
| 33        | 1                  | 6.60    | 10.62   | 0.876                                       | 2179                                           | 0.657                        | 34.16                  |
|           | 2                  | 14.17   | 20.70   | 5.173                                       | 1898                                           | 0.173                        | 34.11                  |
|           | 3                  | 14.05   | 16.04   | 5.180                                       | 2167                                           | 0.173                        | 34.11                  |
|           | 4                  | 6.78    | 10.32   | 0.880                                       | 2403                                           | 0.658                        | 34.13                  |
|           | 5                  | 6.46    | 9.55    | 0.626                                       | 1622                                           | 0.821                        | 34.14                  |
|           | 6                  | 3.05    | 5.45    | 0.238                                       | 137                                            | 1.079                        | 28.98                  |
| 1         | 1                  | 5.99    | 12.33   | 0.958                                       | 2155                                           | 0.581                        | 89.54                  |
|           | 2                  | 6.17    | 12.16   | 1.012                                       | 2281                                           | 0.554                        | 87.34                  |
|           | 3                  | 6.06    | 12.06   | 1.011                                       | 2329                                           | 0.555                        | 89.18                  |
|           | 4                  | 6.16    | 12.48   | 0.953                                       | 2091                                           | 0.581                        | 89.53                  |
|           | 5                  | 3.47    | 8.91    | 0.373                                       | 430                                            | 0.895                        | 100.00                 |
|           | 6                  | 4.84    | 11.13   | 0.475                                       | 737                                            | 0.847                        | 95.18                  |

**Table SI.9.** Porosity data for the fully mixed CMP-1 models generated using various quantities of DMF, averaged across repeat models 1–4. PLD – pore limiting diameter, MPD – maximum pore diameter, He volume – pore volume based on a helium probe, accessible SA – network accessible surface area.

| % Solvent | Desolvation scheme | PLD / Å | MPD / Å | He Volume / cm <sup>3</sup> g <sup>-1</sup> | Accessible SA / m <sup>2</sup> g <sup>-1</sup> | Density / g cm <sup>-3</sup> | % Size of Initial Cell |
|-----------|--------------------|---------|---------|---------------------------------------------|------------------------------------------------|------------------------------|------------------------|
| 100       | 1                  |         |         | Empty cell after desolvation.               |                                                |                              |                        |
|           | 2                  |         |         | Empty cell after desolvation.               |                                                |                              |                        |
|           | 3                  |         |         | Empty cell after desolvation.               |                                                |                              |                        |
|           | 4                  |         |         | Empty cell after desolvation.               |                                                |                              |                        |
|           | 5                  | 13.64   | 24.24   | 1.221                                       | 2285                                           | 0.519                        | 63.74                  |
|           | 6                  | 7.743   | 15.12   | 0.728                                       | 1646                                           | 0.732                        | 50.31                  |
| 67        | 1                  | 15.33   | 20.47   | 6.311                                       | 2169                                           | 0.145                        | 29.73                  |
|           | 2                  |         |         | Empty cell after desolvation.               |                                                |                              |                        |
|           | 3                  |         |         | Empty cell after desolvation.               |                                                |                              |                        |
|           | 4                  | 16.11   | 21.48   | 6.309                                       | 2162                                           | 0.145                        | 29.73                  |
|           | 5                  | 12.91   | 20.16   | 1.264                                       | 2576                                           | 0.513                        | 62.06                  |
|           | 6                  | 7.38    | 12.45   | 1.249                                       | 2922                                           | 0.649                        | 48.57                  |
| 33        | 1                  | 7.54    | 10.26   | 0.974                                       | 2571                                           | 0.625                        | 35.92                  |
|           | 2                  |         |         | Empty cell after desolvation.               |                                                |                              |                        |
|           | 3                  | 15.29   | 21.46   | 5.753                                       | 1882                                           | 0.158                        | 20.87                  |
|           | 4                  | 6.98    | 10.57   | 0.978                                       | 2592                                           | 0.624                        | 20.84                  |
|           | 5                  | 6.41    | 10.00   | 0.843                                       | 1967                                           | 0.711                        | 20.84                  |
|           | 6                  | 2.59    | 5.24    | 0.180                                       | 171                                            | 1.173                        | 16.95                  |
| 1         | 1                  | 6.60    | 12.98   | 0.835                                       | 1907                                           | 0.688                        | 92.57                  |
|           | 2                  | 6.59    | 12.08   | 0.874                                       | 2006                                           | 0.679                        | 88.93                  |
|           | 3                  | 6.23    | 12.62   | 0.854                                       | 1976                                           | 0.684                        | 88.34                  |
|           | 4                  | 7.11    | 11.51   | 0.823                                       | 1846                                           | 0.700                        | 91.64                  |
|           | 5                  | 3.25    | 8.09    | 0.281                                       | 189                                            | 1.000                        | 100.00                 |
|           | 6                  | 5.05    | 11.33   | 0.467                                       | 826                                            | 0.873                        | 98.28                  |

## 5. Phase Separated Systems

The Phase Separated Systems were all generated using the experimental quantity of solvent and TEA (100%, Table SI.10) but differ in the configuration of monomers with respect to the solvent during the seeding process (Figure 4). A range of models were generated, ranging from the fully mixed systems, where the building blocks were randomly added into the simulation cell, to a system with four clusters of monomers and catalyst surrounded by solvent, to a system with two clusters of monomers and catalyst surrounded by solvent, to a system with one cluster of monomers and catalyst surrounded by monomers and solvent. We also generated a one large cluster model for the Solvent/Monomer Phase Interface Systems, where the number of monomers and catalyst molecules were scaled up by 15x, whilst keeping the quantity of solvent constant, which are analysed together with the Phase Separated Systems. To ensure that the building blocks could find their optimal orientation, these models were generated in a much larger starting cell size (cell length – 200 angstrom).

**Table SI.10.** Number of building blocks seeded to the simulation cell for each of the phase separation systems generated with the experimental quantity of solvent.

| Building block | Configuration                                                                       |                                                                                     |                                                                                     |                                                                                       |                                                                                       |
|----------------|-------------------------------------------------------------------------------------|-------------------------------------------------------------------------------------|-------------------------------------------------------------------------------------|---------------------------------------------------------------------------------------|---------------------------------------------------------------------------------------|
|                | Fully mixed large cell                                                              | Four clusters                                                                       | Two clusters                                                                        | One small cluster                                                                     | One large cluster                                                                     |
|                | 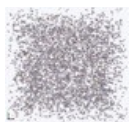 | 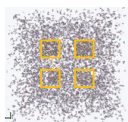 | 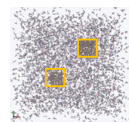 | 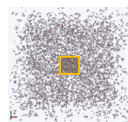 | 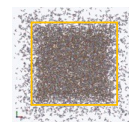 |
| Catalyst       | 4                                                                                   | 4                                                                                   | 4                                                                                   | 4                                                                                     | 60                                                                                    |
| DBB            | 100                                                                                 | 100                                                                                 | 100                                                                                 | 100                                                                                   | 1500                                                                                  |
| TEB            | 100                                                                                 | 100                                                                                 | 100                                                                                 | 100                                                                                   | 1500                                                                                  |
| TEA            | 1076                                                                                | 1076                                                                                | 1076                                                                                | 1076                                                                                  | 1076                                                                                  |
| Toluene        | 2347                                                                                | 2347                                                                                | 2347                                                                                | 2347                                                                                  | 2347                                                                                  |
| THF            | 3082                                                                                | 3082                                                                                | 3082                                                                                | 3082                                                                                  | 3082                                                                                  |
| Dioxane        | 2934                                                                                | 2934                                                                                | 2934                                                                                | 2934                                                                                  | 2934                                                                                  |
| DMF            | 3229                                                                                | 3229                                                                                | 3229                                                                                | 3229                                                                                  | 3229                                                                                  |

After the network generation was complete, again judged by the point at which no new bonds had formed during at least the last twenty zipBlocks tests, an extra NPT MD step was undertaken to equilibrate the cell volume. This was followed by a desolvation protocol consisting of: alkyne-alkyne homocoupling, solvent removal, monomer removal, catalyst removal, and cell workup, with NPT MD throughout to equilibrate the cell.

### Potential Energies

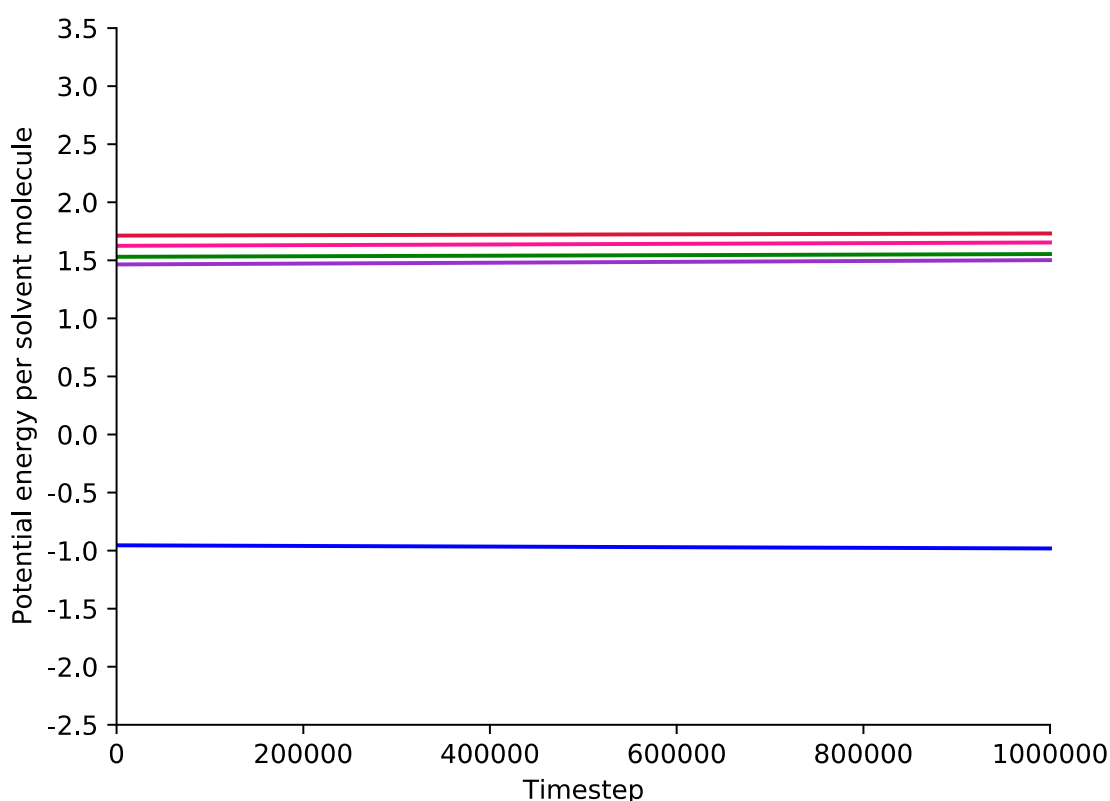

**Figure SI.6.** Plot of the average potential energy trend per solvent molecule against the reaction timestep for the CMP-1 phase separated systems generated in toluene solvent using molecular dynamic simulations without any possibility of bond formation. Also included are the Solvent/Monomer Phase Interface Systems one large cluster models for comparison. Key: Fully mixed large cell – purple, four clusters – green, two clusters – red, one small cluster – pink, one large cluster – blue.

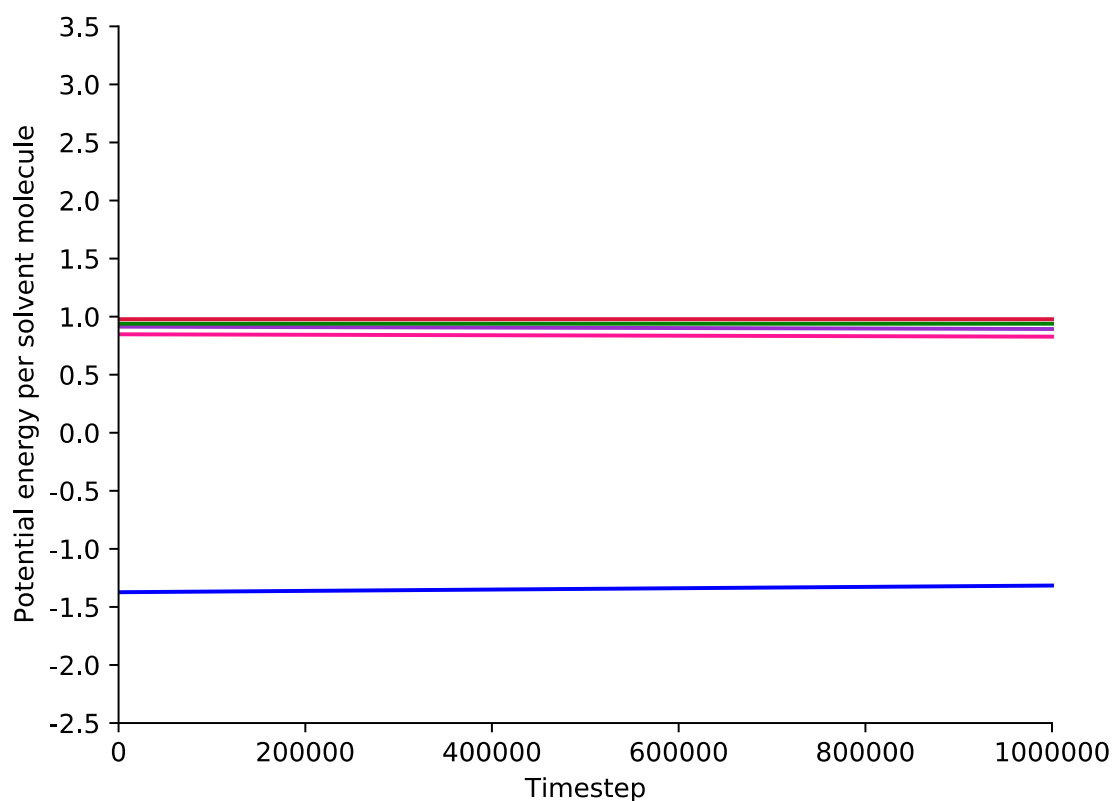

**Figure SI.7.** Plot of the average potential energy trend per solvent molecule against the reaction timestep for the CMP-1 phase separated systems generated in THF solvent using molecular dynamic simulations without any possibility of bond formation. Also included are the Solvent/Monomer Phase Interface Systems one large cluster models for comparison. Key: Fully mixed large cell – purple, four clusters – green, two clusters – red, one small cluster – pink, one large cluster – blue.

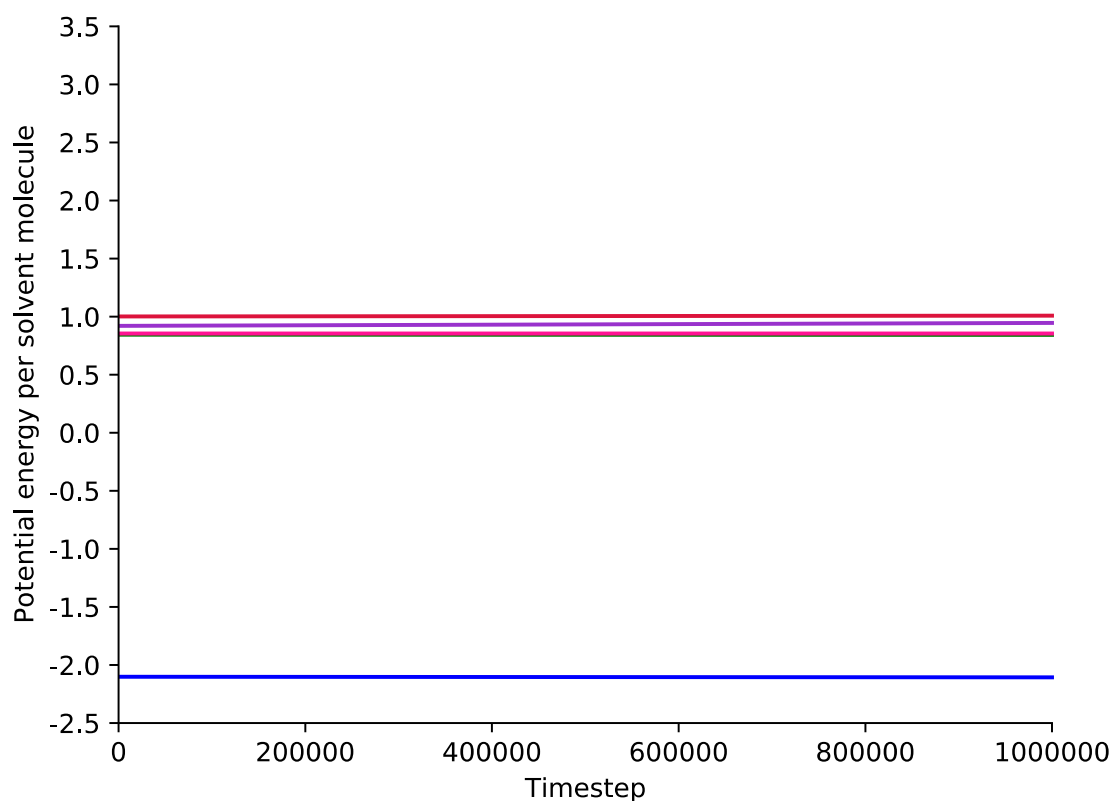

**Figure SI.8.** Plot of the average potential energy trend per solvent molecule against the reaction timestep for the CMP-1 phase separated systems generated in 1,4-dioxane solvent using molecular dynamic simulations without any possibility of bond formation. Also included are the Solvent/Monomer Phase Interface Systems one large cluster models for comparison. Key: Fully mixed large cell – purple, four clusters – green, two clusters – red, one small cluster – pink, one large cluster – blue.

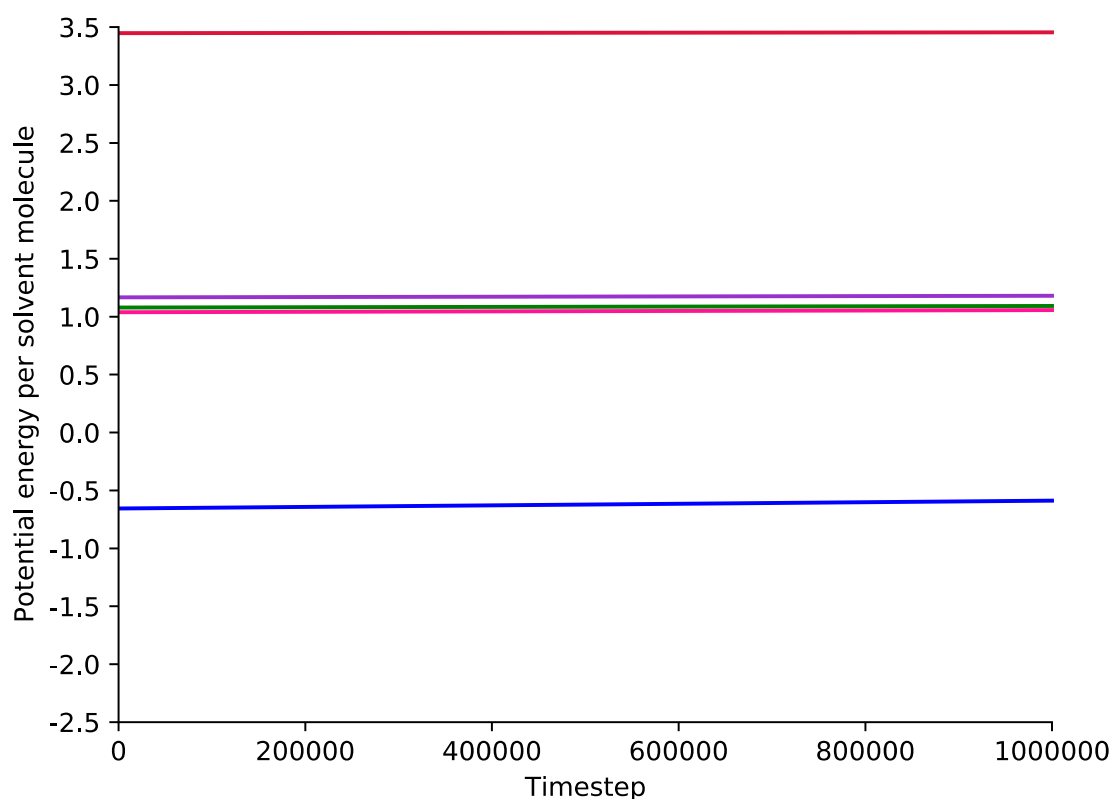

**Figure SI.9.** Plot of the average potential energy trend per solvent molecule against the reaction timestep for the CMP-1 phase separated systems generated in DMF solvent using molecular dynamic simulations without any possibility of bond formation. Also included are the Solvent/Monomer Phase Interface Systems one large cluster models for comparison. Key: Fully mixed large cell – purple, four clusters – green, two clusters – red, one small cluster – pink, one large cluster – blue.

## Surface Areas

**Table SI.11.** Porosity data for the CMP-1 models generated in the fully mixed large cell configuration. PLD – pore limiting diameter, MPD – maximum pore diameter, He volume – pore volume based on a helium probe, accessible SA – network accessible surface area.

| Solvent | Model   | PLD<br>/ Å | MPD<br>/ Å | He Volume<br>/ cm <sup>3</sup> g <sup>-1</sup> | Accessible SA<br>/ m <sup>2</sup> g <sup>-1</sup> | Density<br>/ g cm <sup>-3</sup> | % Size of<br>Initial Cell |
|---------|---------|------------|------------|------------------------------------------------|---------------------------------------------------|---------------------------------|---------------------------|
| Toluene | 1       | 18.37      | 25.46      | 8.311                                          | 11275                                             | 0.111                           | 32.55                     |
|         | 2       | 15.44      | 23.55      | 6.067                                          | 10461                                             | 0.148                           | 29.77                     |
|         | 3       | 15.38      | 21.29      | 5.543                                          | 10038                                             | 0.160                           | 28.62                     |
|         | 4       | 19.80      | 29.41      | 10.962                                         | 12109                                             | 0.086                           | 35.36                     |
|         | Average | 17.25      | 24.93      | 7.721                                          | 10971                                             | 0.126                           | 31.57                     |
| THF     | 1       | 17.78      | 29.98      | 8.951                                          | 11648                                             | 0.104                           | 33.15                     |
|         | 2       | 13.84      | 20.73      | 4.788                                          | 9229                                              | 0.182                           | 27.52                     |
|         | 3       | 17.26      | 26.48      | 9.146                                          | 12060                                             | 0.102                           | 33.48                     |
|         | 4       | 23.05      | 33.49      | 12.822                                         | 12818                                             | 0.074                           | 36.90                     |
|         | Average | 17.98      | 27.67      | 8.927                                          | 11439                                             | 0.116                           | 32.77                     |
| Dioxane | 1       | 21.88      | 29.30      | 11.832                                         | 12883                                             | 0.080                           | 35.94                     |
|         | 2       | 21.78      | 29.94      | 11.837                                         | 12458                                             | 0.080                           | 36.06                     |
|         | 3       | 20.16      | 26.74      | 8.768                                          | 11821                                             | 0.106                           | 32.91                     |
|         | 4       | 13.51      | 21.30      | 5.040                                          | 9382                                              | 0.174                           | 28.03                     |
|         | Average | 19.33      | 26.82      | 9.369                                          | 11636                                             | 0.110                           | 33.24                     |
| DMF     | 1       | 18.29      | 27.90      | 9.280                                          | 11549                                             | 0.100                           | 33.64                     |
|         | 2       | 19.99      | 29.75      | 9.069                                          | 11849                                             | 0.103                           | 33.28                     |
|         | 3       | 20.18      | 29.32      | 10.553                                         | 11970                                             | 0.089                           | 34.83                     |
|         | 4       | 20.65      | 32.62      | 11.926                                         | 12345                                             | 0.079                           | 36.02                     |
|         | Average | 19.78      | 29.90      | 10.207                                         | 11928                                             | 0.093                           | 34.44                     |

**Table SI.12.** Porosity data for the CMP-1 models generated in the four clusters configuration. PLD – pore limiting diameter, MPD – maximum pore diameter, He volume – pore volume based on a helium probe, accessible SA – network accessible surface area.

| Solvent | Model   | PLD<br>/ Å | MPD<br>/ Å | He Volume<br>/ cm <sup>3</sup> g <sup>-1</sup> | Accessible SA<br>/ m <sup>2</sup> g <sup>-1</sup> | Density<br>/ g cm <sup>-3</sup> | % Size of<br>Initial Cell |
|---------|---------|------------|------------|------------------------------------------------|---------------------------------------------------|---------------------------------|---------------------------|
| Toluene | 1       | 4.67       | 9.65       | 0.769                                          | 1286                                              | 0.616                           | 18.65                     |
|         | 2       | 3.45       | 7.37       | 0.500                                          | 306                                               | 0.728                           | 17.48                     |
|         | 3       | 6.84       | 12.01      | 1.145                                          | 2658                                              | 0.514                           | 19.96                     |
|         | 4       | 18.92      | 25.69      | 4.866                                          | 7349                                              | 0.179                           | 27.86                     |
|         | Average | 8.47       | 13.68      | 1.820                                          | 2900                                              | 0.509                           | 20.99                     |
| THF     | 1       | 6.74       | 11.43      | 1.233                                          | 3039                                              | 0.493                           | 20.48                     |
|         | 2       | 4.01       | 9.67       | 0.675                                          | 999                                               | 0.652                           | 18.41                     |
|         | 3       | 8.26       | 14.59      | 1.843                                          | 4689                                              | 0.382                           | 21.87                     |
|         | 4       | 14.24      | 22.87      | 3.065                                          | 6354                                              | 0.265                           | 24.50                     |
|         | Average | 8.31       | 14.64      | 1.704                                          | 3770                                              | 0.448                           | 21.31                     |
| Dioxane | 1       | 14.41      | 22.50      | 2.528                                          | 5247                                              | 0.305                           | 23.75                     |
|         | 2       | 16.45      | 24.90      | 4.166                                          | 7667                                              | 0.205                           | 26.73                     |
|         | 3       | 19.11      | 33.35      | 5.774                                          | 8755                                              | 0.155                           | 30.16                     |
|         | 4       | 4.42       | 9.81       | 0.887                                          | 1792                                              | 0.582                           | 18.85                     |
|         | Average | 13.60      | 22.64      | 3.339                                          | 5865                                              | 0.312                           | 24.87                     |
| DMF     | 1       | 9.59       | 20.98      | 2.438                                          | 5517                                              | 0.315                           | 23.35                     |
|         | 2       | 12.59      | 23.70      | 3.539                                          | 7280                                              | 0.234                           | 25.43                     |
|         | 3       | 10.60      | 19.98      | 2.167                                          | 5024                                              | 0.343                           | 22.50                     |
|         | 4       | 4.42       | 9.29       | 0.647                                          | 1110                                              | 0.672                           | 18.60                     |
|         | Average | 9.30       | 18.49      | 2.198                                          | 4733                                              | 0.391                           | 22.47                     |

**Table SI.13.** Porosity data for the CMP-1 models generated in the two clusters configuration. PLD – pore limiting diameter, MPD – maximum pore diameter, He volume – pore volume based on a helium probe, accessible SA – network accessible surface area.

| Solvent | Model   | PLD<br>/ Å | MPD<br>/ Å | He Volume<br>/ cm <sup>3</sup> g <sup>-1</sup> | Accessible SA<br>/ m <sup>2</sup> g <sup>-1</sup> | Density<br>/ g cm <sup>-3</sup> | % Size of<br>Initial Cell |
|---------|---------|------------|------------|------------------------------------------------|---------------------------------------------------|---------------------------------|---------------------------|
| Toluene | 1       | 8.95       | 12.91      | 1.724                                          | 4551                                              | 0.405                           | 20.96                     |
|         | 2       | 21.48      | 35.76      | 6.829                                          | 7499                                              | 0.133                           | 30.30                     |
|         | 3       | 8.56       | 16.36      | 1.748                                          | 4327                                              | 0.401                           | 20.81                     |
|         | 4       | 6.49       | 11.46      | 0.991                                          | 2340                                              | 0.561                           | 18.07                     |
|         | Average | 11.37      | 19.12      | 2.823                                          | 4679                                              | 0.375                           | 22.54                     |
| THF     | 1       | 11.30      | 19.90      | 2.277                                          | 4980                                              | 0.331                           | 22.79                     |
|         | 2       | 18.15      | 23.16      | 3.384                                          | 5321                                              | 0.243                           | 24.73                     |
|         | 3       | 6.42       | 11.41      | 0.767                                          | 1488                                              | 0.632                           | 18.09                     |
|         | 4       | 13.58      | 24.26      | 3.540                                          | 6487                                              | 0.235                           | 24.44                     |
|         | Average | 12.36      | 19.68      | 2.492                                          | 4569                                              | 0.360                           | 22.51                     |
| Dioxane | 1       | 9.36       | 16.60      | 2.186                                          | 5261                                              | 0.343                           | 21.95                     |
|         | 2       | 5.36       | 10.41      | 0.908                                          | 1903                                              | 0.581                           | 18.48                     |
|         | 3       | 17.86      | 25.62      | 4.241                                          | 6904                                              | 0.201                           | 26.58                     |
|         | 4       | 5.04       | 8.80       | 0.533                                          | 787                                               | 0.726                           | 17.48                     |
|         | Average | 9.41       | 15.36      | 1.967                                          | 3714                                              | 0.463                           | 21.12                     |
| DMF     | 1       | 24.45      | 37.88      | 7.917                                          | 7173                                              | 0.116                           | 31.57                     |
|         | 2       | 16.47      | 23.27      | 3.758                                          | 6415                                              | 0.223                           | 25.23                     |
|         | 3       | 2.85       | 6.09       | 0.308                                          | 0                                                 | 0.832                           | 16.59                     |
|         | 4       | 11.84      | 17.55      | 2.365                                          | 5731                                              | 0.323                           | 22.55                     |
|         | Average | 13.90      | 21.20      | 3.587                                          | 4829                                              | 0.374                           | 23.98                     |

**Table SI.14.** Porosity data for the CMP-1 models generated in the one small cluster configuration. PLD – pore limiting diameter, MPD – maximum pore diameter, He volume – pore volume based on a helium probe, accessible SA – network accessible surface area.

| Solvent | Model   | PLD<br>/ Å | MPD<br>/ Å | He Volume<br>/ cm <sup>3</sup> g <sup>-1</sup> | Accessible SA<br>/ m <sup>2</sup> g <sup>-1</sup> | Density<br>/ g cm <sup>-3</sup> | % Size of<br>Initial Cell |
|---------|---------|------------|------------|------------------------------------------------|---------------------------------------------------|---------------------------------|---------------------------|
| Toluene | 1       | 6.95       | 12.07      | 1.194                                          | 2682                                              | 0.505                           | 19.08                     |
|         | 2       | 13.89      | 20.81      | 2.123                                          | 4358                                              | 0.348                           | 21.48                     |
|         | 3       | 15.32      | 23.35      | 4.118                                          | 6554                                              | 0.206                           | 26.35                     |
|         | 4       | 10.45      | 18.57      | 2.033                                          | 4906                                              | 0.358                           | 21.77                     |
|         | Average | 11.65      | 18.70      | 2.367                                          | 4625                                              | 0.354                           | 22.17                     |
| THF     | 1       | 11.22      | 17.73      | 2.463                                          | 5546                                              | 0.314                           | 23.05                     |
|         | 2       | 21.94      | 30.22      | 5.407                                          | 6862                                              | 0.164                           | 28.84                     |
|         | 3       | 14.26      | 21.76      | 2.964                                          | 5983                                              | 0.271                           | 24.57                     |
|         | 4       | 7.45       | 12.43      | 1.203                                          | 2852                                              | 0.501                           | 19.28                     |
|         | Average | 13.72      | 20.54      | 3.009                                          | 5311                                              | 0.313                           | 23.94                     |
| Dioxane | 1       | 7.30       | 14.06      | 1.512                                          | 3902                                              | 0.438                           | 20.66                     |
|         | 2       | 23.67      | 35.26      | 5.717                                          | 6376                                              | 0.155                           | 29.02                     |
|         | 3       | 20.88      | 34.50      | 4.618                                          | 5797                                              | 0.186                           | 26.30                     |
|         | 4       | 15.53      | 22.77      | 3.973                                          | 7029                                              | 0.214                           | 25.25                     |
|         | Average | 16.85      | 26.65      | 3.955                                          | 5776                                              | 0.248                           | 25.31                     |
| DMF     | 1       | 19.24      | 24.43      | 3.263                                          | 5015                                              | 0.248                           | 24.58                     |
|         | 2       | 26.43      | 36.17      | 7.600                                          | 7030                                              | 0.120                           | 30.93                     |
|         | 3       | 6.01       | 11.49      | 1.004                                          | 2334                                              | 0.552                           | 19.01                     |
|         | 4       | 18.95      | 35.46      | 4.932                                          | 6751                                              | 0.178                           | 27.84                     |
|         | Average | 17.66      | 26.89      | 4.200                                          | 5282                                              | 0.275                           | 25.59                     |

**Table SI.15.** Comparison of the porosity data for the CMP-1 models generated in the various phase separation configurations. Cluster SA relative to number of DBB blocks – surface area of the initial cluster regions composed of monomers and catalyst relative to the number of 1,4-dibromobenzene building blocks within the cell (we assume that the cluster surface area of the fully mixed large cells will be approaching infinity, so use a very large surface area value here), PLD – pore limiting diameter, MPD – maximum pore diameter, He volume – pore volume based on a helium probe, accessible SA – network accessible surface area.

| Solvent | Phase separation  | Cluster SA relative to number of DBB blocks | PLD / Å | MPD / Å | He Volume / cm <sup>3</sup> g <sup>-1</sup> | Accessible SA / m <sup>2</sup> g <sup>-1</sup> | Density / g cm <sup>-3</sup> | % Size of Initial Cell |
|---------|-------------------|---------------------------------------------|---------|---------|---------------------------------------------|------------------------------------------------|------------------------------|------------------------|
| Toluene | Fully mixed large | 1E+15                                       | 17.25   | 24.93   | 7.72                                        | 10971                                          | 0.13                         | 31.57                  |
|         | Four clusters     | 216                                         | 8.47    | 13.68   | 1.82                                        | 2900                                           | 0.51                         | 20.99                  |
|         | Two clusters      | 108                                         | 11.37   | 19.12   | 2.82                                        | 4679                                           | 0.38                         | 22.54                  |
|         | One small cluster | 96                                          | 11.65   | 18.70   | 2.37                                        | 4625                                           | 0.35                         | 22.17                  |
| THF     | Fully mixed large | 1E+15                                       | 17.98   | 27.67   | 8.93                                        | 11439                                          | 0.12                         | 32.77                  |
|         | Four clusters     | 216                                         | 8.31    | 14.64   | 1.70                                        | 3770                                           | 0.45                         | 21.31                  |
|         | Two clusters      | 108                                         | 12.36   | 19.68   | 2.49                                        | 4569                                           | 0.36                         | 22.51                  |
|         | One small cluster | 96                                          | 13.72   | 20.54   | 3.01                                        | 5311                                           | 0.31                         | 23.94                  |
| Dioxane | Fully mixed large | 1E+15                                       | 19.33   | 26.82   | 9.37                                        | 11636                                          | 0.11                         | 33.24                  |
|         | Four clusters     | 216                                         | 13.60   | 22.64   | 3.34                                        | 5865                                           | 0.31                         | 24.87                  |
|         | Two clusters      | 108                                         | 9.41    | 15.36   | 1.97                                        | 3714                                           | 0.46                         | 21.12                  |
|         | One small cluster | 96                                          | 16.85   | 26.65   | 3.96                                        | 5776                                           | 0.25                         | 25.31                  |
| DMF     | Fully mixed large | 1E+15                                       | 19.78   | 29.90   | 10.21                                       | 11928                                          | 0.09                         | 34.44                  |
|         | Four clusters     | 216                                         | 9.30    | 18.49   | 2.20                                        | 4733                                           | 0.39                         | 22.47                  |
|         | Two clusters      | 108                                         | 13.90   | 21.20   | 3.59                                        | 4829                                           | 0.37                         | 23.98                  |
|         | One small cluster | 96                                          | 17.66   | 26.89   | 4.20                                        | 5282                                           | 0.27                         | 25.59                  |

**Table SI.16.** Elemental analysis data for the CMP-1 models generated in the fully mixed large cell configuration.

| Solvent | Model   | wt% C | wt% H | wt% N | wt% O | wt% P | wt% Cu | wt% Br | wt% Pd |
|---------|---------|-------|-------|-------|-------|-------|--------|--------|--------|
| Toluene | 1       | 89.50 | 2.91  | 0.00  | 0.00  | 1.34  | 3.09   | 0.86   | 2.30   |
|         | 2       | 88.55 | 2.83  | 0.00  | 0.00  | 1.31  | 5.05   | 0.00   | 2.25   |
|         | 3       | 91.02 | 2.98  | 0.00  | 0.00  | 1.37  | 1.40   | 0.88   | 2.35   |
|         | 4       | 90.43 | 2.95  | 0.00  | 0.00  | 1.35  | 2.08   | 0.87   | 2.32   |
|         | Average | 89.88 | 2.92  | 0.00  | 0.00  | 1.34  | 2.90   | 0.65   | 2.31   |
| THF     | 1       | 90.74 | 2.96  | 0.00  | 0.00  | 1.36  | 1.74   | 0.87   | 2.33   |
|         | 2       | 90.54 | 2.92  | 0.00  | 0.00  | 1.35  | 2.43   | 0.44   | 2.33   |
|         | 3       | 90.66 | 2.93  | 0.00  | 0.00  | 1.34  | 2.76   | 0.00   | 2.31   |
|         | 4       | 90.62 | 2.98  | 0.00  | 0.00  | 1.38  | 1.77   | 0.89   | 2.37   |
|         | Average | 90.64 | 2.95  | 0.00  | 0.00  | 1.36  | 2.17   | 0.55   | 2.33   |
| Dioxane | 1       | 90.93 | 2.99  | 0.00  | 0.00  | 1.38  | 1.42   | 0.89   | 2.38   |
|         | 2       | 91.22 | 2.95  | 0.00  | 0.00  | 1.37  | 2.11   | 0.00   | 2.35   |
|         | 3       | 90.62 | 2.97  | 0.00  | 0.00  | 1.36  | 1.40   | 1.32   | 2.34   |
|         | 4       | 90.31 | 2.95  | 0.00  | 0.00  | 1.34  | 1.37   | 1.73   | 2.30   |
|         | Average | 90.77 | 2.97  | 0.00  | 0.00  | 1.36  | 1.57   | 0.98   | 2.34   |
| DMF     | 1       | 90.24 | 2.92  | 0.00  | 0.00  | 1.34  | 2.76   | 0.43   | 2.31   |
|         | 2       | 90.05 | 2.94  | 0.00  | 0.00  | 1.36  | 2.44   | 0.88   | 2.33   |
|         | 3       | 90.54 | 2.94  | 0.00  | 0.00  | 1.37  | 2.80   | 0.00   | 2.35   |
|         | 4       | 90.53 | 2.95  | 0.00  | 0.00  | 1.38  | 1.42   | 1.34   | 2.38   |
|         | Average | 90.34 | 2.94  | 0.00  | 0.00  | 1.36  | 2.35   | 0.66   | 2.34   |

**Table SI.17.** Elemental analysis data for the CMP-1 models generated in the four clusters configuration.

| Solvent | Model   | wt% C | wt% H | wt% N | wt% O | wt% P | wt% Cu | wt% Br | wt% Pd |
|---------|---------|-------|-------|-------|-------|-------|--------|--------|--------|
| Toluene | 1       | 88.56 | 2.74  | 0.00  | 0.00  | 1.28  | 2.31   | 2.90   | 2.21   |
|         | 2       | 90.64 | 2.80  | 0.00  | 0.00  | 1.32  | 1.69   | 1.28   | 2.27   |
|         | 3       | 88.49 | 2.68  | 0.00  | 0.00  | 1.26  | 4.19   | 1.22   | 2.16   |
|         | 4       | 90.73 | 2.85  | 0.00  | 0.00  | 1.33  | 2.38   | 0.43   | 2.28   |
|         | Average | 89.61 | 2.77  | 0.00  | 0.00  | 1.30  | 2.64   | 1.46   | 2.23   |
| THF     | 1       | 88.93 | 2.77  | 0.00  | 0.00  | 1.21  | 1.87   | 3.13   | 2.08   |
|         | 2       | 89.70 | 2.73  | 0.00  | 0.00  | 1.26  | 2.92   | 1.22   | 2.17   |
|         | 3       | 89.61 | 2.77  | 0.00  | 0.00  | 1.28  | 1.65   | 2.48   | 2.21   |
|         | 4       | 88.16 | 2.68  | 0.00  | 0.00  | 1.32  | 4.73   | 0.85   | 2.26   |
|         | Average | 89.10 | 2.74  | 0.00  | 0.00  | 1.27  | 2.79   | 1.92   | 2.18   |
| Dioxane | 1       | 89.67 | 2.78  | 0.00  | 0.00  | 1.26  | 2.90   | 1.22   | 2.16   |
|         | 2       | 91.40 | 2.82  | 0.00  | 0.00  | 1.32  | 1.35   | 0.85   | 2.26   |
|         | 3       | 89.44 | 2.75  | 0.00  | 0.00  | 1.21  | 2.17   | 2.34   | 2.08   |
|         | 4       | 90.49 | 2.79  | 0.00  | 0.00  | 1.32  | 2.70   | 0.43   | 2.26   |
|         | Average | 90.25 | 2.79  | 0.00  | 0.00  | 1.28  | 2.28   | 1.21   | 2.19   |
| DMF     | 1       | 89.08 | 2.74  | 0.00  | 0.00  | 1.28  | 2.63   | 2.07   | 2.20   |
|         | 2       | 90.37 | 2.83  | 0.00  | 0.00  | 1.33  | 1.03   | 2.15   | 2.29   |
|         | 3       | 90.20 | 2.77  | 0.00  | 0.00  | 1.31  | 3.03   | 0.42   | 2.26   |
|         | 4       | 88.44 | 2.75  | 0.00  | 0.00  | 1.19  | 2.13   | 3.45   | 2.04   |
|         | Average | 89.52 | 2.77  | 0.00  | 0.00  | 1.28  | 2.21   | 2.02   | 2.20   |

**Table SI.18.** Elemental analysis data for the CMP-1 models generated in the two clusters configuration.

| Solvent | Model   | wt% C | wt% H | wt% N | wt% O | wt% P | wt% Cu | wt% Br | wt% Pd |
|---------|---------|-------|-------|-------|-------|-------|--------|--------|--------|
| Toluene | 1       | 87.47 | 2.75  | 0.00  | 0.00  | 1.38  | 4.25   | 1.78   | 2.37   |
|         | 2       | 88.95 | 2.80  | 0.00  | 0.00  | 1.39  | 1.78   | 2.69   | 2.39   |
|         | 3       | 88.01 | 2.75  | 0.00  | 0.00  | 1.42  | 4.01   | 1.37   | 2.44   |
|         | 4       | 87.56 | 2.65  | 0.00  | 0.00  | 1.55  | 5.57   | 0.00   | 2.67   |
|         | Average | 88.00 | 2.74  | 0.00  | 0.00  | 1.44  | 3.90   | 1.46   | 2.47   |
| THF     | 1       | 88.08 | 2.70  | 0.00  | 0.00  | 1.31  | 2.69   | 2.96   | 2.25   |
|         | 2       | 89.55 | 2.69  | 0.00  | 0.00  | 1.40  | 3.95   | 0.00   | 2.40   |
|         | 3       | 89.54 | 2.75  | 0.00  | 0.00  | 1.37  | 1.76   | 2.22   | 2.36   |
|         | 4       | 89.67 | 2.80  | 0.00  | 0.00  | 1.50  | 1.54   | 1.93   | 2.57   |
|         | Average | 89.21 | 2.74  | 0.00  | 0.00  | 1.40  | 2.48   | 1.78   | 2.40   |
| Dioxane | 1       | 89.44 | 2.79  | 0.00  | 0.00  | 1.42  | 2.54   | 1.37   | 2.43   |
|         | 2       | 88.56 | 2.67  | 0.00  | 0.00  | 1.40  | 3.60   | 1.36   | 2.41   |
|         | 3       | 89.94 | 2.85  | 0.00  | 0.00  | 1.36  | 1.75   | 1.76   | 2.34   |
|         | 4       | 88.29 | 2.74  | 0.00  | 0.00  | 1.33  | 2.38   | 2.99   | 2.28   |
|         | Average | 89.06 | 2.76  | 0.00  | 0.00  | 1.38  | 2.57   | 1.87   | 2.37   |
| DMF     | 1       | 91.51 | 2.63  | 0.00  | 0.00  | 1.06  | 2.53   | 0.45   | 1.82   |
|         | 2       | 89.89 | 2.79  | 0.00  | 0.00  | 1.44  | 2.95   | 0.46   | 2.47   |
|         | 3       | 88.17 | 2.84  | 0.00  | 0.00  | 1.35  | 1.39   | 3.93   | 2.33   |
|         | 4       | 88.68 | 2.75  | 0.00  | 0.00  | 1.39  | 3.91   | 0.89   | 2.38   |
|         | Average | 89.56 | 2.75  | 0.00  | 0.00  | 1.31  | 2.70   | 1.44   | 2.25   |

**Table SI.19.** Elemental analysis data for the CMP-1 models generated in the one small cluster configuration.

| Solvent | Model   | wt% C | wt% H | wt% N | wt% O | wt% P | wt% Cu | wt% Br | wt% Pd |
|---------|---------|-------|-------|-------|-------|-------|--------|--------|--------|
| Toluene | 1       | 89.03 | 2.75  | 0.00  | 0.00  | 1.46  | 1.88   | 2.36   | 2.52   |
|         | 2       | 89.72 | 2.78  | 0.00  | 0.00  | 1.49  | 1.53   | 1.92   | 2.56   |
|         | 3       | 89.12 | 2.80  | 0.00  | 0.00  | 1.36  | 1.75   | 2.64   | 2.34   |
|         | 4       | 88.70 | 2.76  | 0.00  | 0.00  | 1.39  | 2.50   | 2.25   | 2.39   |
|         | Average | 89.14 | 2.77  | 0.00  | 0.00  | 1.43  | 1.91   | 2.29   | 2.45   |
| THF     | 1       | 88.54 | 2.68  | 0.00  | 0.00  | 1.34  | 3.42   | 1.72   | 2.29   |
|         | 2       | 89.87 | 2.70  | 0.00  | 0.00  | 1.31  | 3.02   | 0.84   | 2.25   |
|         | 3       | 88.12 | 2.73  | 0.00  | 0.00  | 1.28  | 1.97   | 3.71   | 2.20   |
|         | 4       | 89.75 | 2.71  | 0.00  | 0.00  | 1.43  | 3.66   | 0.00   | 2.45   |
|         | Average | 89.07 | 2.71  | 0.00  | 0.00  | 1.34  | 3.02   | 1.57   | 2.30   |
| Dioxane | 1       | 90.12 | 2.68  | 0.00  | 0.00  | 1.33  | 2.73   | 0.86   | 2.28   |
|         | 2       | 88.91 | 2.72  | 0.00  | 0.00  | 1.35  | 2.08   | 2.62   | 2.32   |
|         | 3       | 88.84 | 2.83  | 0.00  | 0.00  | 1.52  | 2.73   | 1.47   | 2.61   |
|         | 4       | 90.26 | 2.81  | 0.00  | 0.00  | 1.49  | 1.91   | 0.96   | 2.56   |
|         | Average | 89.53 | 2.76  | 0.00  | 0.00  | 1.42  | 2.36   | 1.48   | 2.45   |
| DMF     | 1       | 90.05 | 2.75  | 0.00  | 0.00  | 1.39  | 2.50   | 0.90   | 2.40   |
|         | 2       | 90.67 | 2.67  | 0.00  | 0.00  | 1.08  | 1.85   | 1.86   | 1.86   |
|         | 3       | 89.51 | 2.71  | 0.00  | 0.00  | 1.36  | 2.78   | 1.31   | 2.33   |
|         | 4       | 89.65 | 2.74  | 0.00  | 0.00  | 1.34  | 1.37   | 2.59   | 2.30   |
|         | Average | 89.97 | 2.72  | 0.00  | 0.00  | 1.29  | 2.13   | 1.67   | 2.22   |

**Table SI.20.** Comparison of the elemental analysis data for the CMP-1 models generated in the various phase separation configurations.

| Solvent | Phase separation  | wt% C | wt% H | wt% N | wt% O | wt% P | wt% Cu | wt% Br | wt% Pd |
|---------|-------------------|-------|-------|-------|-------|-------|--------|--------|--------|
| Toluene | Fully mixed large | 89.88 | 2.92  | 0.00  | 0.00  | 1.34  | 2.90   | 0.65   | 2.31   |
|         | Four clusters     | 89.61 | 2.77  | 0.00  | 0.00  | 1.30  | 2.64   | 1.46   | 2.23   |
|         | Two clusters      | 88.00 | 2.74  | 0.00  | 0.00  | 1.44  | 3.90   | 1.46   | 2.47   |
|         | One small cluster | 89.14 | 2.77  | 0.00  | 0.00  | 1.43  | 1.91   | 2.29   | 2.45   |
| THF     | Fully mixed large | 90.64 | 2.95  | 0.00  | 0.00  | 1.36  | 2.17   | 0.55   | 2.33   |
|         | Four clusters     | 89.10 | 2.74  | 0.00  | 0.00  | 1.27  | 2.79   | 1.92   | 2.18   |
|         | Two clusters      | 89.21 | 2.74  | 0.00  | 0.00  | 1.40  | 2.48   | 1.78   | 2.40   |
|         | One small cluster | 89.07 | 2.71  | 0.00  | 0.00  | 1.34  | 3.02   | 1.57   | 2.30   |
| Dioxane | Fully mixed large | 90.77 | 2.97  | 0.00  | 0.00  | 1.36  | 1.57   | 0.98   | 2.34   |
|         | Four clusters     | 90.25 | 2.79  | 0.00  | 0.00  | 1.28  | 2.28   | 1.21   | 2.19   |
|         | Two clusters      | 89.06 | 2.76  | 0.00  | 0.00  | 1.38  | 2.57   | 1.87   | 2.37   |
|         | One small cluster | 89.53 | 2.76  | 0.00  | 0.00  | 1.42  | 2.36   | 1.48   | 2.45   |
| DMF     | Fully mixed large | 90.34 | 2.94  | 0.00  | 0.00  | 1.36  | 2.35   | 0.66   | 2.34   |
|         | Four clusters     | 89.52 | 2.77  | 0.00  | 0.00  | 1.28  | 2.21   | 2.02   | 2.20   |
|         | Two clusters      | 89.56 | 2.75  | 0.00  | 0.00  | 1.31  | 2.70   | 1.44   | 2.25   |
|         | One small cluster | 89.97 | 2.72  | 0.00  | 0.00  | 1.29  | 2.13   | 1.67   | 2.22   |

## 6. Solvent/Monomer Phase Interface Systems

### Degree of solvent diffusion – pre-network formation

The concentration profiles generated show how the normalised number/count of solvent molecules changes going across the centre of the simulation cell from one edge to the other in each of the three dimensions using the following lattice ranges: x: 0.45–0.55, y: 0–1 and z: 0.45–0.55 (slice A), x: 0–1, y: 0.45–0.55 and z: 0.45–0.55 (slice B), and x: 0.45–0.55, y: 0.45–0.55 and z: 0–1 (slice C).

Figure SI.10 shows a cartoon representation of the method taken. In each case, a slice was taken through the centre of the cell in the plane of the two dimensions with the lattice ranges of 0.45–0.55, and then fragments were taken by travelling across the third axis (with the lattice range of 0–1), binning the structures into fragments of lattice range size 0.1, and counting the number of solvent molecules within each fragment.

*E.g.*, for slice A, the slice was taken through the xz plane, keeping the molecules that were within  $x = 0.45\text{--}0.55$  and  $z = 0.45\text{--}0.55$ , and fragments were sampled at y ranges of 0–0.1, 0.1–0.2, 0.2–0.3, 0.3–0.4, 0.4–0.5, 0.5–0.6, 0.6–0.7, 0.7–0.8, 0.8–0.9, and 0.9–1. Then, the number of solvent molecules within each fragment were calculated, and normalised to a percentage using the following formula:

$$\text{Normalised count} = 100 \times \frac{\text{Number of solvent molecules in the fragment}}{\text{Total number of solvent molecules}}$$

3- dimensional

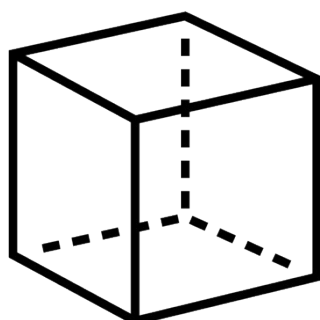

Take the whole cell and keep  
the coordinates that are in  
axis 1 range (green)

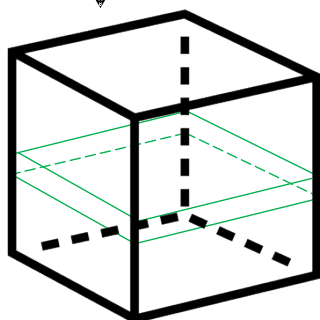

Keep the coordinates that are  
also in axis 2 range (pink)

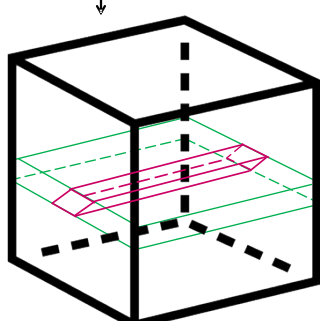

Sample fragments of the  
obtained slice (yellow) and  
count solvent molecules

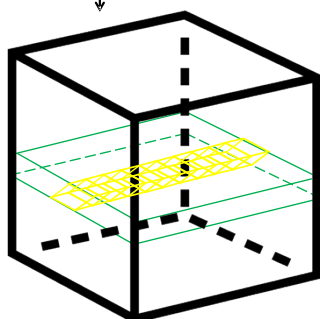

2- dimensional

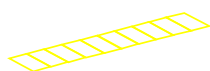

**Figure SI.10.** Cartoon representation of the methodology undertaken to calculate the concentration profiles for the CMP-1 Solvent/Monomer Phase Interface Systems potential energy diffusion models generated in each solvent. For clarity, a 2-dimensional representation of the slice is also shown.

The concentration profiles for the CMP-1 Solvent/Monomer Phase Interface Systems potential energy diffusion models generated in each solvent are given in Figures SI.11–SI.14.

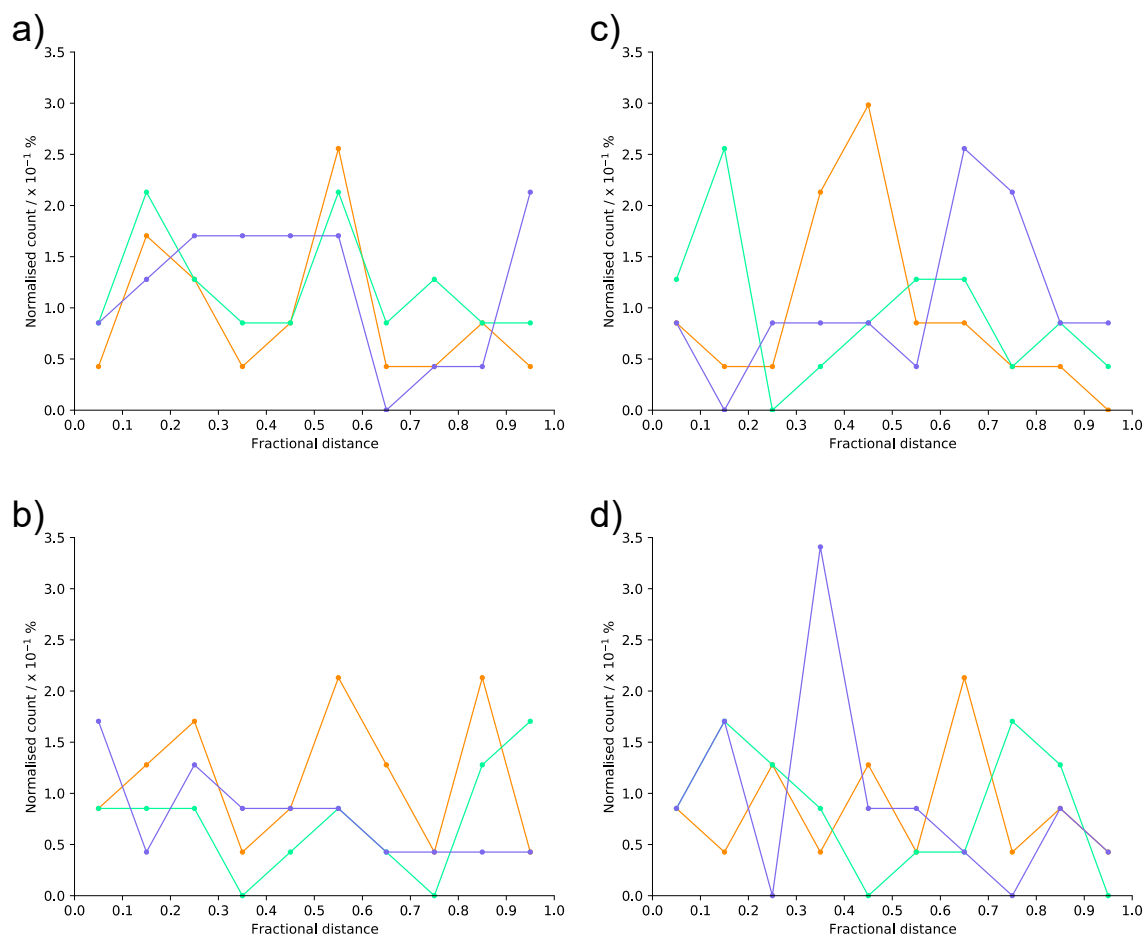

**Figure SI.11.** Plot of the concentration profile of the CMP-1 Solvent/Monomer Phase Interface Systems potential energy diffusion models generated in toluene solvent. a) Model 1, b) Model 2, c) Model 3, d) Model 4. Key: slice A – orange, slice B – green, slice C – purple.

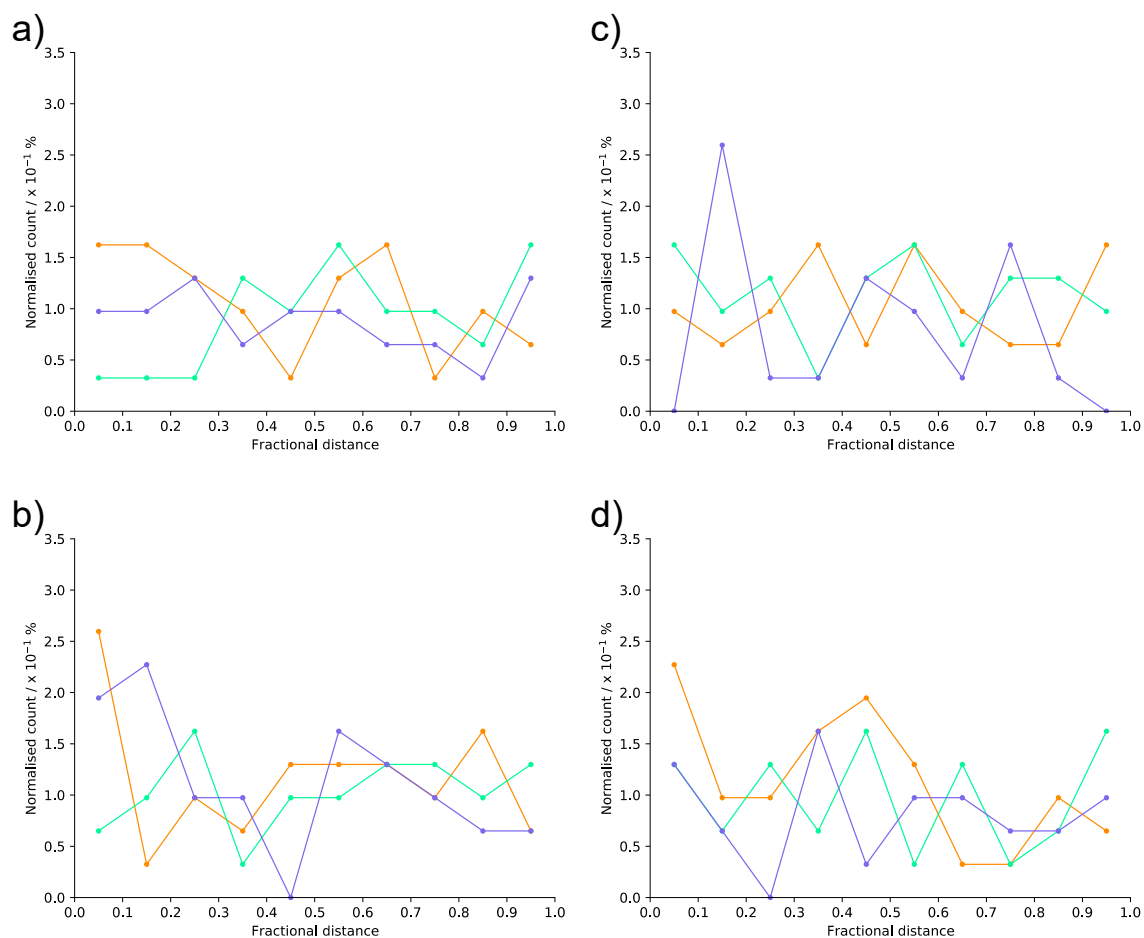

**Figure SI.12.** Plot of the concentration profile of the CMP-1 Solvent/Monomer Phase Interface Systems potential energy diffusion models generated in THF solvent. a) Model 1, b) Model 2, c) Model 3, d) Model 4. Key: slice A – orange, slice B – green, slice C – purple.

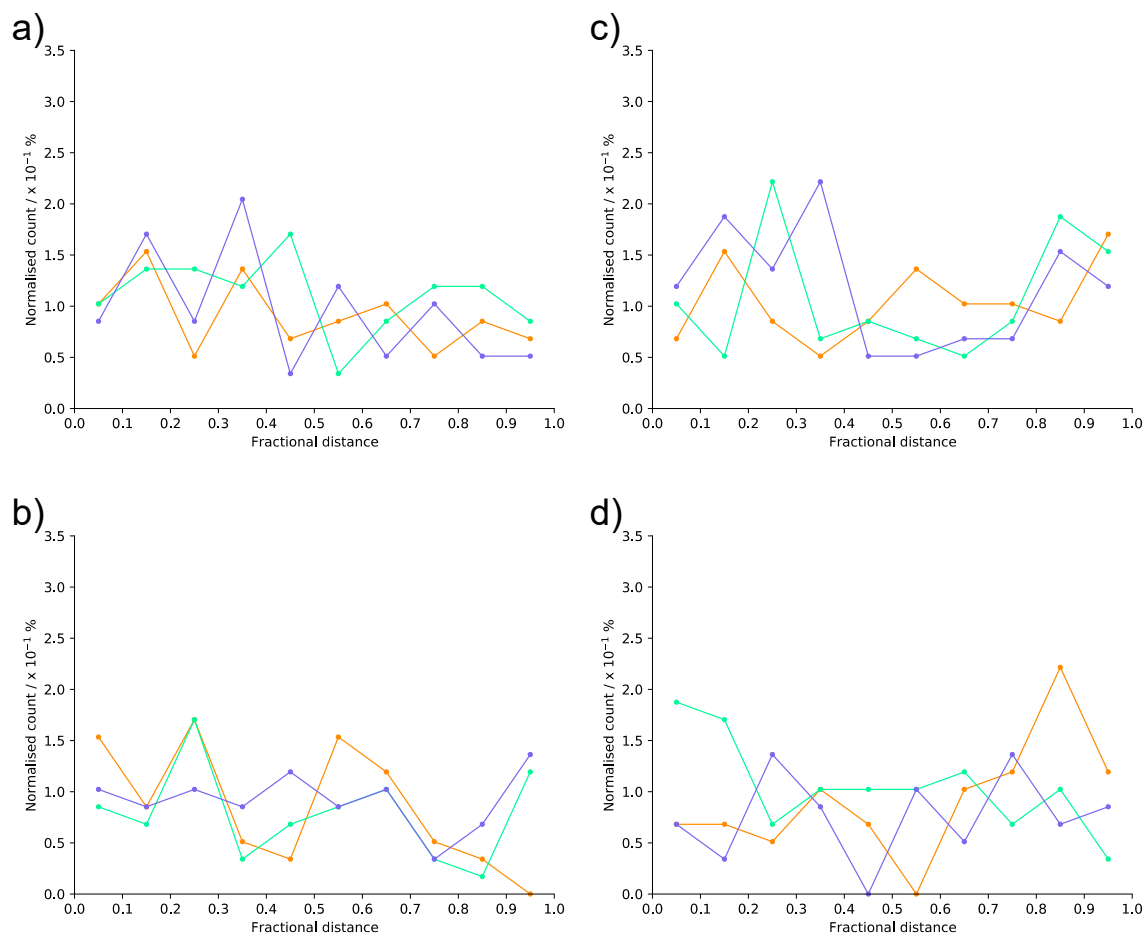

**Figure SI.13.** Plot of the concentration profile of the CMP-1 Solvent/Monomer Phase Interface Systems potential energy diffusion models generated in 1,4-dioxane solvent. a) Model 1, b) Model 2, c) Model 3, d) Model 4. Key: slice A – orange, slice B – green, slice C – purple.

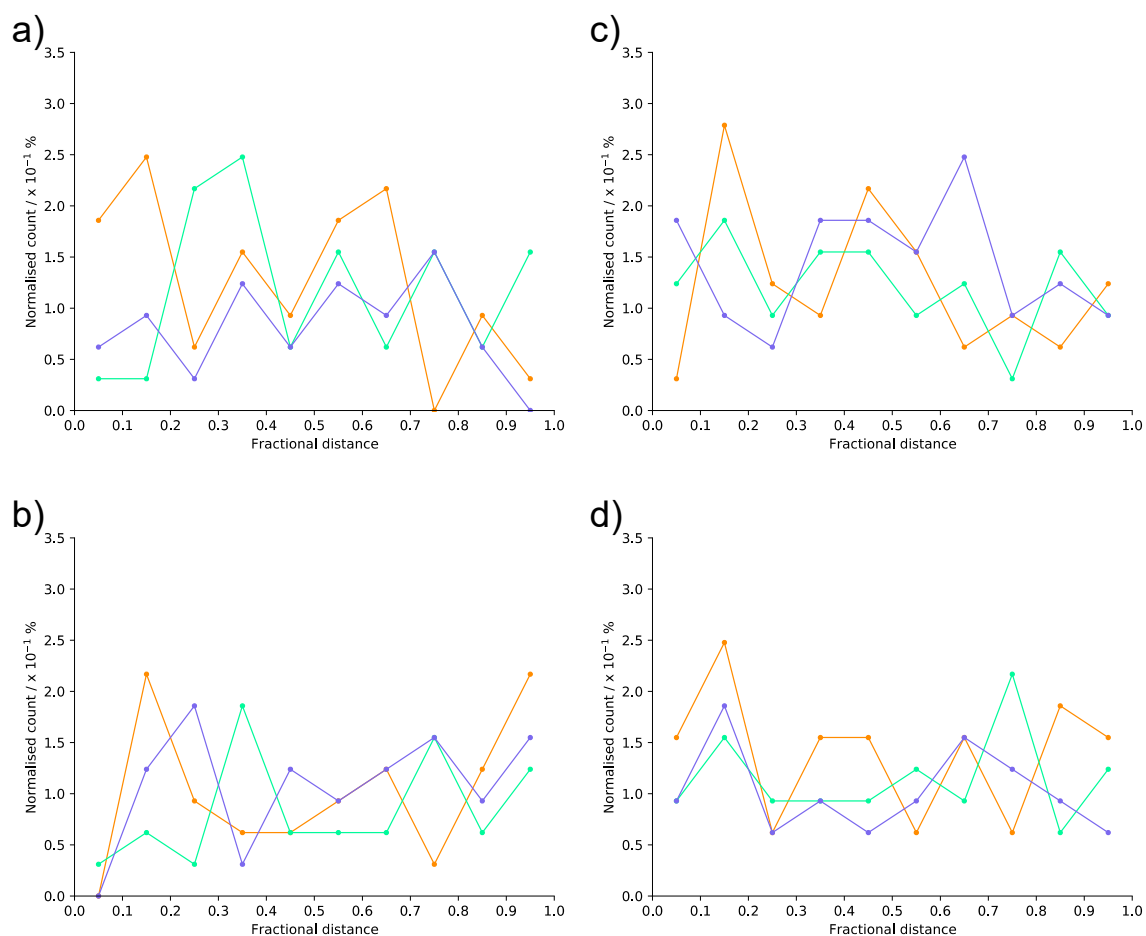

**Figure SI.14.** Plot of the concentration profile of the CMP-1 Solvent/Monomer Phase Interface Systems potential energy diffusion models generated in DMF solvent. a) Model 1, b) Model 2, c) Model 3, d) Model 4. Key: slice A – orange, slice B – green, slice C – purple.

We also generated some ‘four-dimensional concentration profiles’, where each point on the plot represents the xyz coordinates of the centre of one of the studied fragments, *e.g.*, for the first fragment taken in slice A, the coordinates plotted would be (0.5, 0.05, 0.5). The points are then colour coded by taking the average of the normalised counts across models 1–4 for that fragment. The four-dimensional concentration profiles are given in Figures SI.15–SI.18.

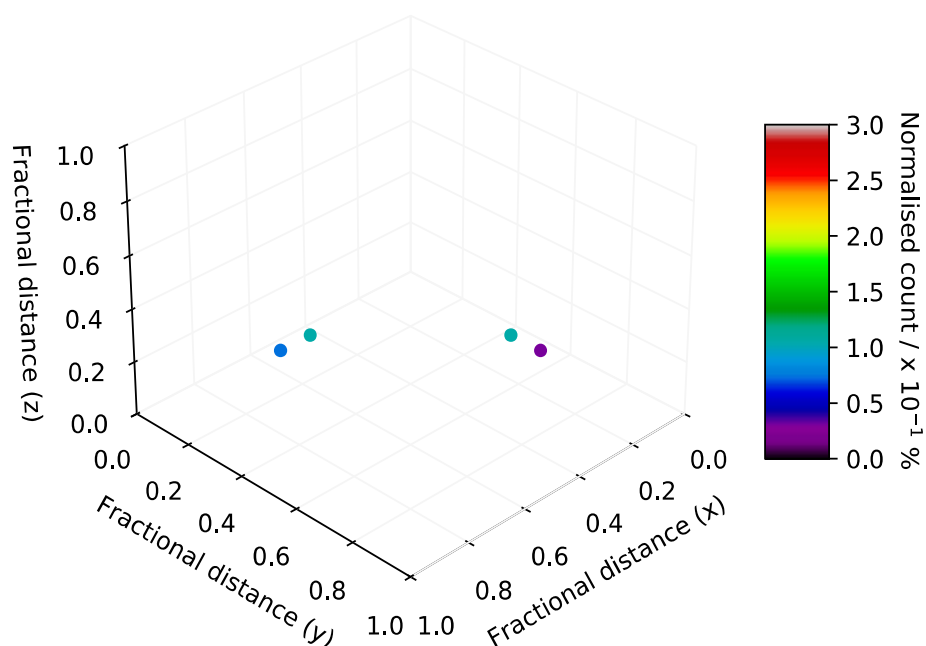

**Figure SI.15.** Plot of the four-dimensional concentration profile of the CMP-1 Solvent/Monomer Phase Interface Systems potential energy diffusion models generated in toluene solvent.

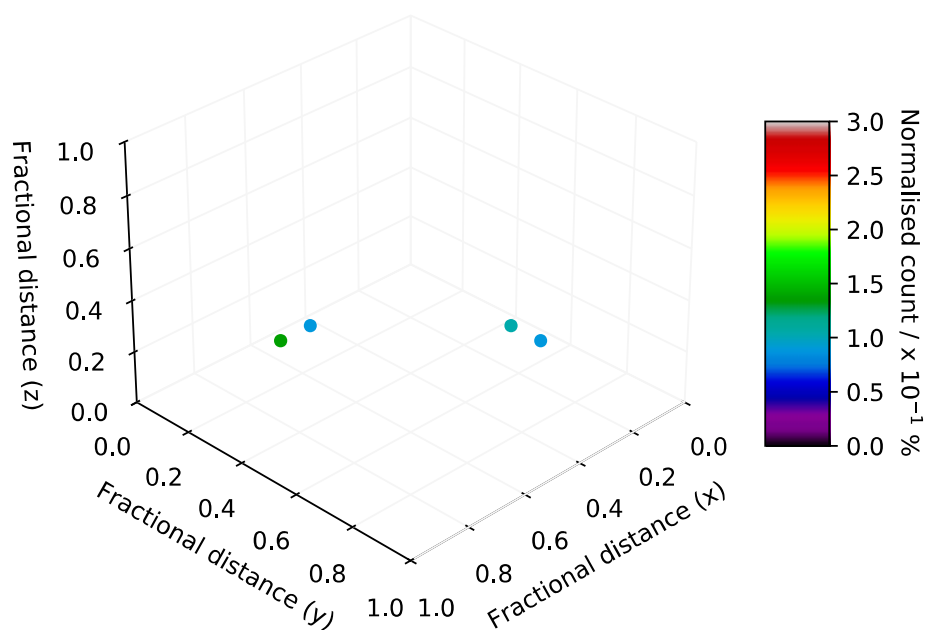

**Figure SI.16.** Plot of the four-dimensional concentration profile of the CMP-1 Solvent/Monomer Phase Interface Systems potential energy diffusion models generated in THF solvent.

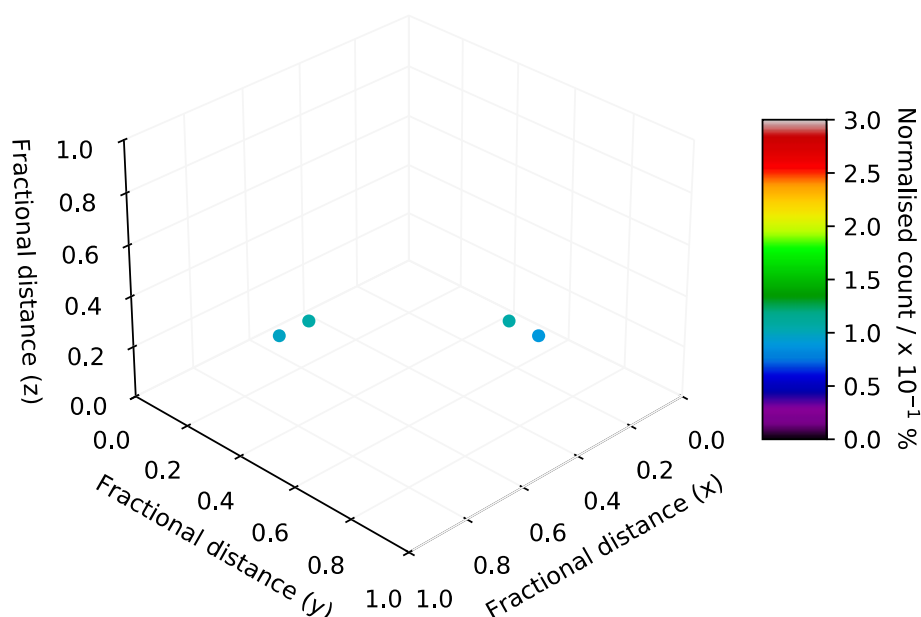

**Figure SI.17.** Plot of the four-dimensional concentration profile of the CMP-1 Solvent/Monomer Phase Interface Systems potential energy diffusion models generated in 1,4-dioxane solvent.

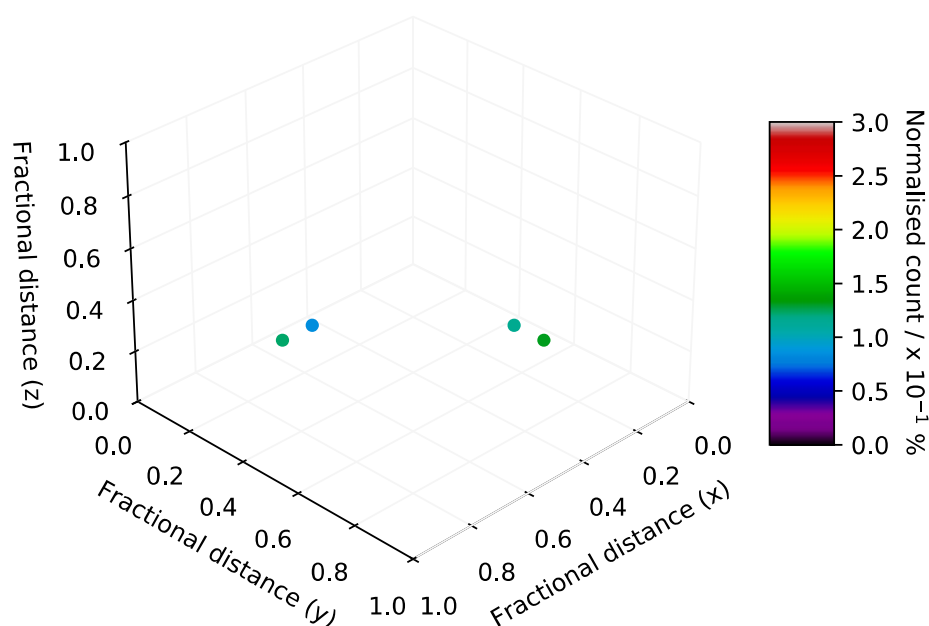

**Figure SI.18.** Plot of the four-dimensional concentration profile of the CMP-1 Solvent/Monomer Phase Interface Systems potential energy diffusion models generated in DMF solvent.

Based on the concentration profiles, we then calculated the fractional distances associated with the largest normalised count for each slice in each model. The plot of fractional distance against solvent polarity index<sup>4</sup> is shown in Figure SI.19.

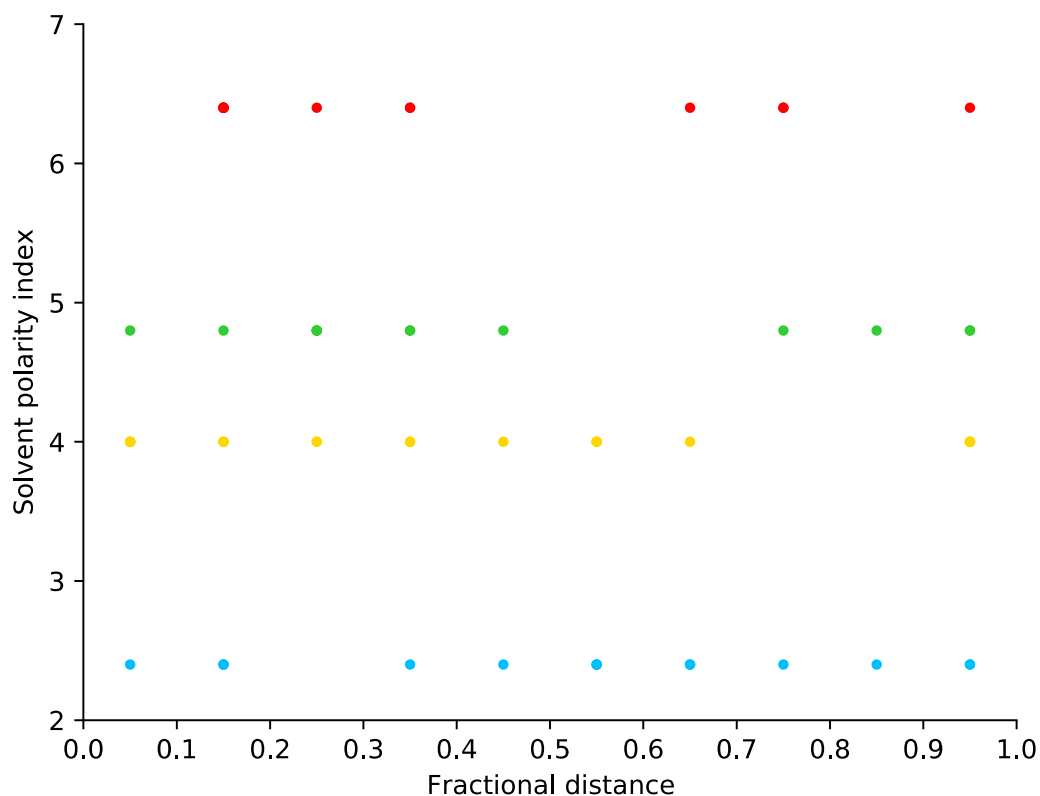

**Figure SI.19.** Plot of the fractional distances corresponding to the largest normalised count for each slice in each of the CMP-1 Solvent/Monomer Phase Interface Systems potential energy diffusion models generated. Key: toluene – blue, THF – yellow, 1,4-dioxane – green, DMF – red.

### Degree of solvent diffusion – post network formation and desolvation

The Solvent/Monomer Phase Interface Systems were analysed after both network generation (once the polymer framework had completely formed) and after the desolvation protocol using Materials Studio 5.0. Slices were taken through the centre of each model using the lattice parameters of a: 0.45–0.55, b: 0–1 and c: 0–1 (slice A) and a: 0–1, b: 0.45–0.55 and c: 0–1 (slice B). For the slices taken after the network generation, this equated to a slice of 20 Å x 200 Å x 200 Å (slice A) or 200 Å x 20 Å x 200 Å (slice B). The slices taken after desolvation were smaller due to a reduction in the unit cell size during the NPT MD stages of the desolvation protocol, however the percentage size of the slice relative to the entire model remained consistent. Then, fragments of the slice were collected and sampled to calculate their density and surface area, and the findings from slices A and B were averaged. The lattice ranges of each fragment are given in Table SI.21.

**Table SI.21.** Lattice ranges of the fragments sampled as part of the Solvent/Monomer Phase Interface Systems analysis.

| Fragment | Slice A lattice range / Å |            |           | Slice B lattice range / Å |           |           |
|----------|---------------------------|------------|-----------|---------------------------|-----------|-----------|
|          | a                         | b          | c         | a                         | b         | c         |
| 0        | 0.00–1.00                 | -0.05–0.05 | 0.45–0.55 | -0.05–0.05                | 0.00–1.00 | 0.45–0.55 |
| 1        | 0.00–1.00                 | 0.00–0.10  | 0.45–0.55 | 0.00–0.10                 | 0.00–1.00 | 0.45–0.55 |
| 2        | 0.00–1.00                 | 0.10–0.20  | 0.45–0.55 | 0.10–0.20                 | 0.00–1.00 | 0.45–0.55 |
| 3        | 0.00–1.00                 | 0.20–0.30  | 0.45–0.55 | 0.20–0.30                 | 0.00–1.00 | 0.45–0.55 |
| 4        | 0.00–1.00                 | 0.30–0.40  | 0.45–0.55 | 0.30–0.40                 | 0.00–1.00 | 0.45–0.55 |
| 5        | 0.00–1.00                 | 0.40–0.50  | 0.45–0.55 | 0.40–0.50                 | 0.00–1.00 | 0.45–0.55 |
| 6        | 0.00–1.00                 | 0.45–0.55  | 0.45–0.55 | 0.45–0.55                 | 0.00–1.00 | 0.45–0.55 |

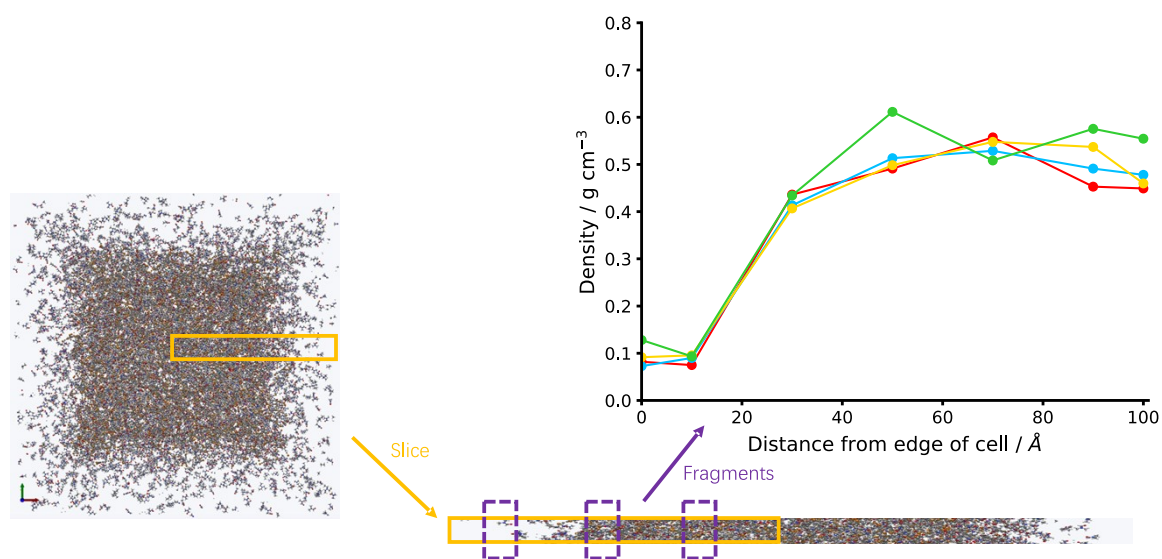

**Figure SI.20.** Example of a slice through a CMP-1 Solvent/Monomer Phase Interface System model and the resulting fragments that were analysed, along with the plot of the average density of the CMP-1 Solvent/Monomer Phase Interface Systems (including solvent) after network generation but before desolvation against the distance from the edge of the simulation cell. Key: toluene – blue, THF – yellow, 1,4-dioxane – green, DMF – red.

**Table SI.22.** Average surface areas across slices A and B of the CMP-1

Solvent/Monomer Phase Interface Systems artificially synthesised in each solvent after network generation. Key – Connolly: Connolly surface area, SSA – smoothed solvent surface area, SASA – smoothed solvent accessible surface area.

| Solvent | Surface Area<br>/ m <sup>2</sup> g <sup>-1</sup> | Fragment ID |       |      |      |      |      |      |
|---------|--------------------------------------------------|-------------|-------|------|------|------|------|------|
|         |                                                  | 0           | 1     | 2    | 3    | 4    | 5    | 6    |
| Toluene | Connolly                                         | 9104        | 9058  | 4732 | 4139 | 4120 | 4521 | 4577 |
|         | SSA                                              | 21857       | 19096 | 5789 | 4338 | 3888 | 4478 | 4603 |
|         | SASA                                             | 21857       | 19095 | 5776 | 4330 | 3868 | 4466 | 5750 |
| THF     | Connolly                                         | 8668        | 8300  | 4494 | 4514 | 4059 | 4128 | 4503 |
|         | SSA                                              | 20886       | 20316 | 5464 | 4522 | 3885 | 4116 | 4868 |
|         | SASA                                             | 20879       | 20309 | 5453 | 4497 | 3855 | 4108 | 4851 |
| Dioxane | Connolly                                         | 7711        | 7659  | 4487 | 3794 | 4372 | 3932 | 4206 |
|         | SSA                                              | 16430       | 18593 | 5279 | 3362 | 4472 | 3694 | 3661 |
|         | SASA                                             | 16428       | 18592 | 5275 | 3351 | 4458 | 3684 | 3654 |
| DMF     | Connolly                                         | 8403        | 9110  | 4666 | 4709 | 4180 | 4415 | 4403 |
|         | SSA                                              | 19313       | 24633 | 5270 | 4503 | 3589 | 4846 | 5192 |
|         | SASA                                             | 19309       | 24631 | 5264 | 4488 | 3570 | 4837 | 5181 |

**Table SI.23.** Average surface areas across slices A and B of the CMP-1 Solvent/Monomer Phase Interface Systems synthesised in each solvent after desolvation. Key – Connolly: Connolly surface area, SSA – smoothed solvent surface area, SASA – smoothed solvent accessible surface area.

| Solvent | Surface Area<br>/ m <sup>2</sup> g <sup>-1</sup> | Fragment ID |      |      |      |      |      |      |
|---------|--------------------------------------------------|-------------|------|------|------|------|------|------|
|         |                                                  | 0           | 1    | 2    | 3    | 4    | 5    | 6    |
| Toluene | Connolly                                         | 3840        | 3078 | 3516 | 5347 | 2683 | 3467 | 3792 |
|         | SSA                                              | 567         | 397  | 92   | 606  | 738  | 248  | 107  |
|         | SASA                                             | 560         | 390  | 12   | 338  | 737  | 163  | 102  |
| THF     | Connolly                                         | 2477        | 1892 | 1101 | 1252 | 3244 | 2712 | 3094 |
|         | SSA                                              | 183         | 93   | 123  | 57   | 1070 | 64   | 1615 |
|         | SASA                                             | 177         | 47   | 122  | 52   | 1067 | 26   | 1609 |
| Dioxane | Connolly                                         | 2052        | 2323 | 2465 | 4220 | 2117 | 3397 | 3126 |
|         | SSA                                              | 219         | 121  | 53   | 1413 | 243  | 247  | 39   |
|         | SASA                                             | 219         | 111  | 45   | 1368 | 201  | 192  | 2    |
| DMF     | Connolly                                         | 2644        | 3830 | 2599 | 2413 | 3509 | 2900 | 1297 |
|         | SSA                                              | 264         | 469  | 251  | 96   | 572  | 443  | 241  |
|         | SASA                                             | 234         | 446  | 212  | 88   | 534  | 380  | 241  |

### Pore size distribution analysis

Pore size distributions were obtained for each of the Solvent/Monomer Phase Interface Systems after the full artificial synthesis (network generation followed by desolvation) protocol. This was done by running each of fragments 0–6 obtained through the Materials Studio slicing procedure for slices A and B (fragment ranges given in Table SI.21) through the Poreblazer 4.0 code.<sup>14</sup> This resulted in 8 structures per fragment per solvent, as there were 4 models generated of each structure, and each was sliced in two directions, A and B. For each fragment and solvent, the respective pore size distribution functions of each of the 8 structures were combined to produce one plot, where the pore widths (x axis) were averaged, as these differed slightly from one model to the next due to different final simulation cell sizes, and the pore intensities were summed to generate the total contribution of pores to each fragment for each solvent. The resulting plots are shown in Figure 7.

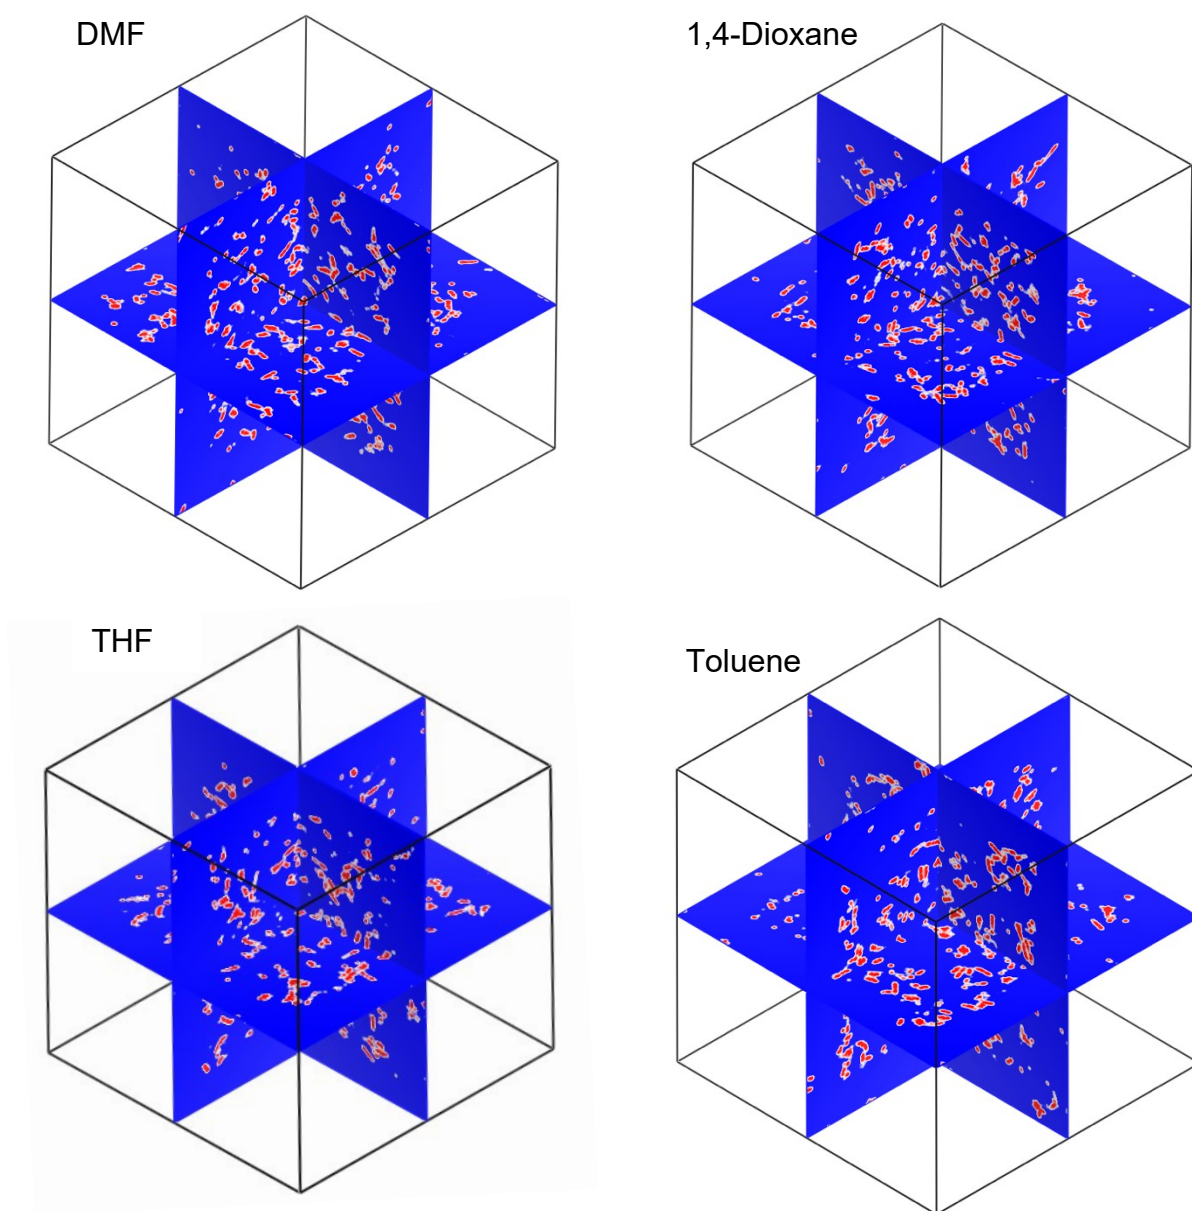

**Figure SI.21.** Cell density slices in the xy, yz, and xz planes through Model 1 for each of the Solvent/Monomer Phase Interface Systems after network generation and before desolvation or homocoupling. Blue regions represent solvent volume and red/white regions represent the CMP-1 framework.

## 7. References

1. J. M. H. Thomas, C. Mollart, L. Turner, P. Heasman, P. Fayon and A. Trewin, *J. Phys. Chem. B*, 2020, **124**, 7318-7326.
2. A. Laybourn, R. Dawson, R. Clowes, T. Hasell, A. I. Cooper, Y. Z. Khimyak and D. J. Adams, *Polym. Chem.*, 2014, **5**, 6325-6333.
3. R. Dawson, A. Laybourn, Y. Z. Khimyak, D. J. Adams and A. I. Cooper, *Macromolecules*, 2010, **43**, 8524-8530.
4. L. R. Snyder, *J. Chromatogr. A*, 1974, **92**, 223-230.
5. A. F. M. Barton, *Handbook of Solubility Parameters and Other Cohesion Parameters*, CRC Press, Boca Raton, 2nd edn., 1991.
6. Z. Zhao, S. Das, G. Xing, P. Fayon, P. Heasman, M. Jay, S. Bailey, C. Lambert, H. Yamada, T. Wakihara, A. Trewin, T. Ben, S. Qiu and V. Valtchev, *Angew. Chem. - Int. Ed.*, 2018, **57**, 11952-11956.
7. P. Fayon, J. M. H. Thomas and A. Trewin, *J. Phys. Chem. C*, 2016, **120**, 25880-25891.
8. A. Liu, C. Mollart, A. Trewin, X. Fan and C. H. Lau, *ChemSusChem*, 2023, **16**, e202300019.
9. J. M. H. Thomas and A. Trewin, *J. Phys. Chem. C*, 2014, **118**, 19712-19722.
10. C. Mollart, S. Holcroft, M. J. G. Peach, A. Rowling and A. Trewin, *Phys. Chem. Chem. Phys.*, 2022, **24**, 20025-20029.
11. J. A. Anderson, C. D. Lorenz and A. Travesset, *J. Comput. Phys.*, 2008, **227**, 5342-5359.
12. J. Glaser, T. D. Nguyen, J. A. Anderson, P. Lui, F. Spiga, J. A. Millan, D. C. Morse and S. C. Glotzer, *Comput. Phys. Commun.*, 2015, **192**, 97-107.
13. L. Sarkisov and A. Harrison, *Mol. Simul.*, 2011, **37**, 1248-1257.
14. L. Sarkisov, R. Bueno-Perez, M. Sutharson and D. Fairen-Jimenez, *Chem. Mater.*, 2020, **32**, 9849-9867.
15. H. Sun, *Macromolecules*, 1995, **28**, 701-712.
